# Supplementary material for: 2-(4-Tolylsulfonyl)ethoxymethyl (TEM)—a new 2′-OH protecting group for solid-supported RNA synthesis
Source: Royal Society of Chemistry journal article supplement (doi:10.1039/b614210a), 2006-12-15

## Supporting Information

### 2-(4-Tolylsulfonyl)ethoxymethyl(TEM) - A New 2'-OH Protecting Group For Solid Support RNA Synthesis

Chuanzheng Zhou, Dmytro Honcharenko and Jyoti Chattopadhyaya\*

Department of Bioorganic Chemistry, Box 581, Biomedical Center,

Uppsala University, S-751 23 Uppsala, Sweden

[jyoti@boc.uu.se](mailto:jyoti@boc.uu.se)

#### content

|                                                                                   |     |
|-----------------------------------------------------------------------------------|-----|
| General Experimental Methods                                                      | S2  |
| Synthetic cycle and reagents                                                      | S1  |
| HPLC profiles of crude ON 1-4                                                     | S4  |
| MS spectrum of synthesized oligo-RNAs                                             | S5  |
| <sup>31</sup> P and <sup>1</sup> H NMR spectra of phosphoramidite                 | S11 |
| <sup>1</sup> H and <sup>13</sup> C NMR spectra of 5'-O-DMTr-2'-TEM ribonucleoside | S19 |
| HPLC profiles of crude ON 3 and 4 under different unblocking conditions           | S23 |
| RNase H digestion of 15 mer DNA/RNA duplex                                        | S35 |
| Compare the purity of purified RNA with that of the crude ON 12                   | S36 |

## General Experimental Methods

Chromatographic separations were performed on Merck G60 silica gel. Thin layer chromatography (TLC) was performed on Merck pre-coated silica gel 60 F<sub>254</sub> glass-backed plates. <sup>1</sup>H NMR spectra were recorded at 270 MHz, using TMS (0.0 ppm) as internal standards. <sup>13</sup>C NMR spectra were recorded at 67.9 MHz, using the central peak of CDCl<sub>3</sub> (76.9 ppm) as an internal standard. <sup>31</sup>P NMR spectra were recorded at 109.4 MHz using 85% phosphoric acid as external standard. Chemical shifts are reported in ppm ( $\delta$  scale). The  $\delta_{C2'}$ ,  $\delta_{C3'}$ ,  $\delta_{H1'}$ ,  $\delta_{H2'}$ ,  $\delta_{H3'}$  are assigned according to H-H cosy and C-H cosy. MALDI-TOF mass spectra were recorded in positive ion mode. For oligo-RNAs, the mass spectrometer was externally calibrated with standard oligonucleotide using 3-HAP and ammonium citrate as co-matrix. For other compounds, the mass spectrometer was externally calibrated with peptide mixture using THPA and ammonium citrate as matrix.

**Table S1. Synthetic cycle and reagents.**

|   | function   | reagents                                                              | Time (s) |
|---|------------|-----------------------------------------------------------------------|----------|
| 1 | coupling   | 0.1 M amidite in CH <sub>3</sub> CN + 0.25M ETT in CH <sub>3</sub> CN | 120      |
| 2 | capping    | 0.1 M Ac <sub>2</sub> O in THF + N-Methylimidazole/THF/Pyridine       | 15       |
| 3 | oxidation  | 0.02 M I <sub>2</sub> in THF-H <sub>2</sub> O-Pyridine (7:1:2)        | 8        |
| 4 | deblocking | 3% DCA in CH <sub>2</sub> Cl <sub>2</sub>                             | 98       |

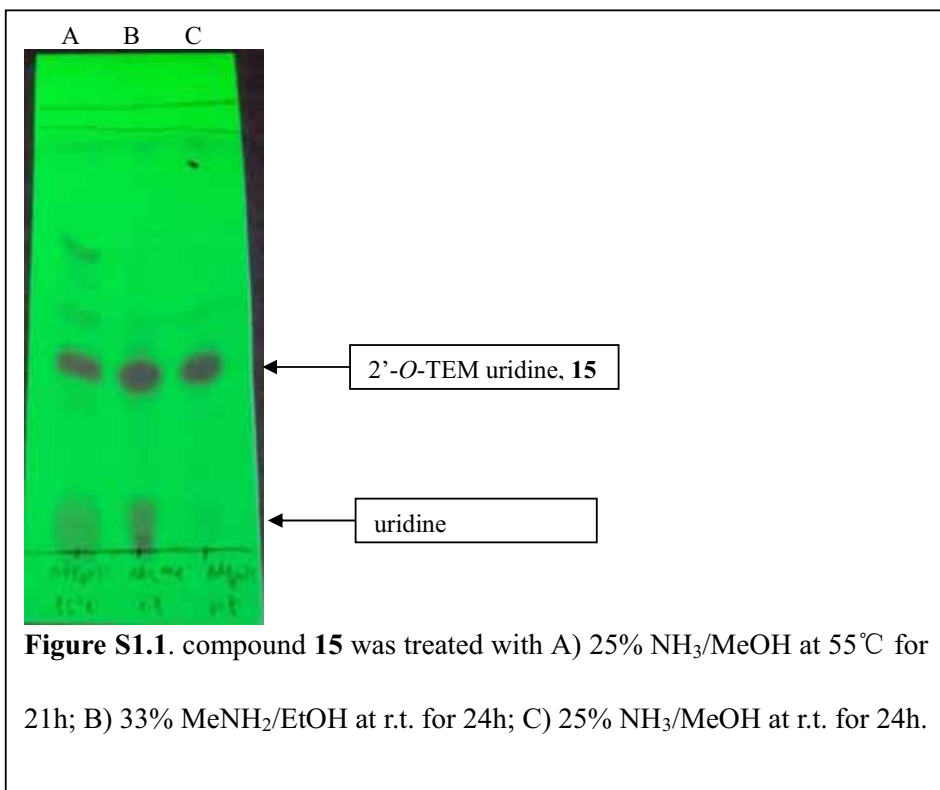

A) ON 1

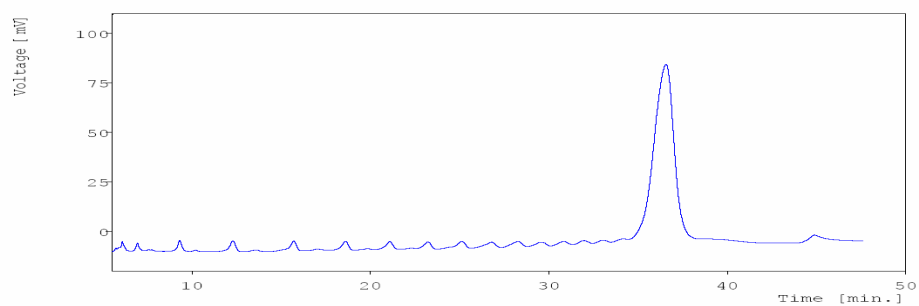

B) ON 2

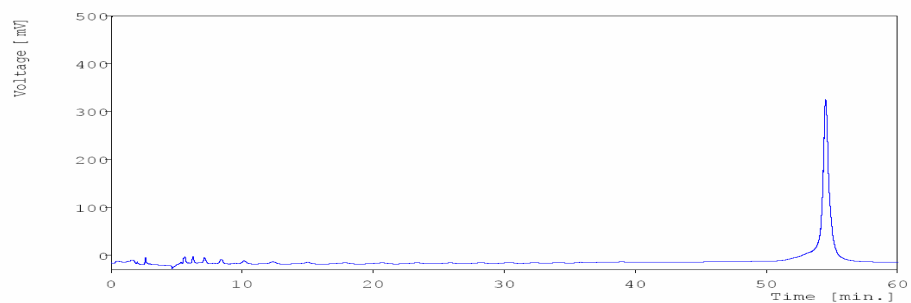

C) ON 3

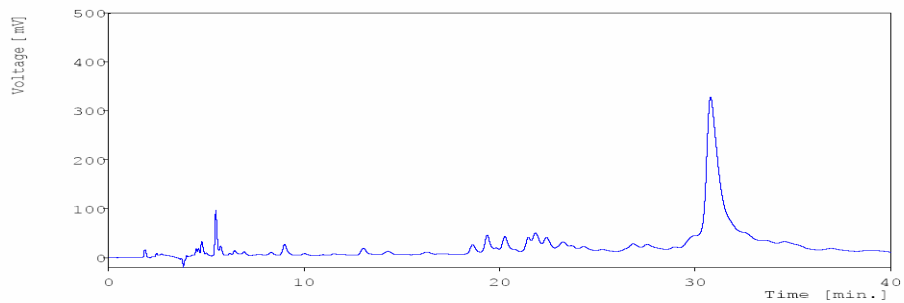

D) ON 4

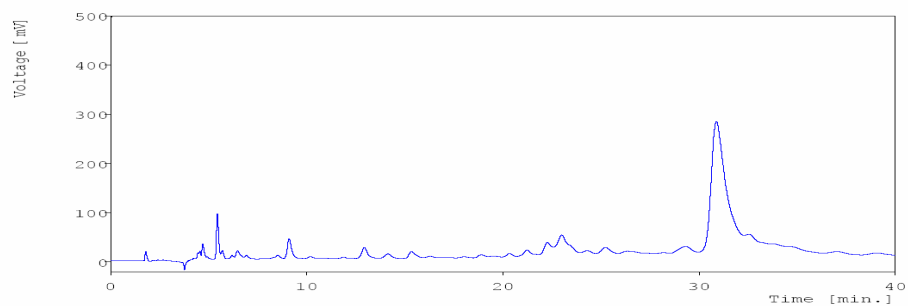

**Figure S1.2.** HPLC profiles of crude products. HPLC conditions: A) ON1. AE HPLC, 0-40 min, buffer A→A/B 2/8. B) ON 2. anion exchange column, 0-60 min, buffer A/B form 6/4 to 2/8. ON 3 and ON 4 : RP column, 0-40 min, buffer C→C/D 8/2.

**MS spectra of synthesized oligo-RNAs.**

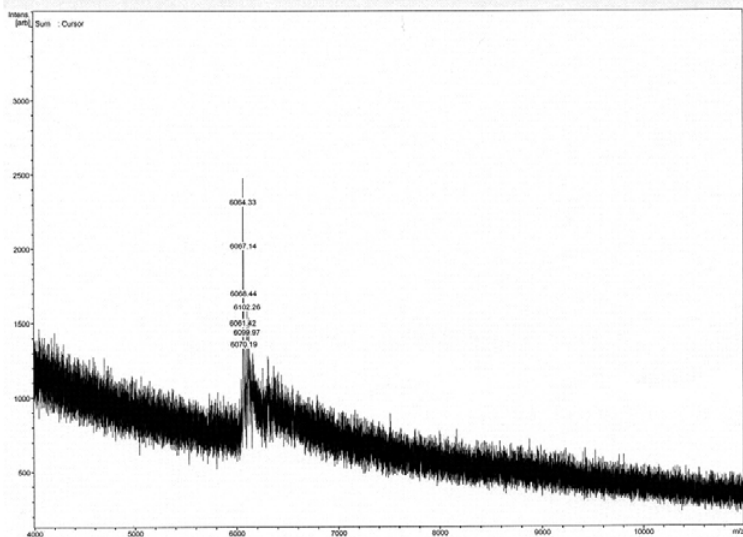

**Figure S1.3.** MALDI-TOF MS spectrum of ON 1.

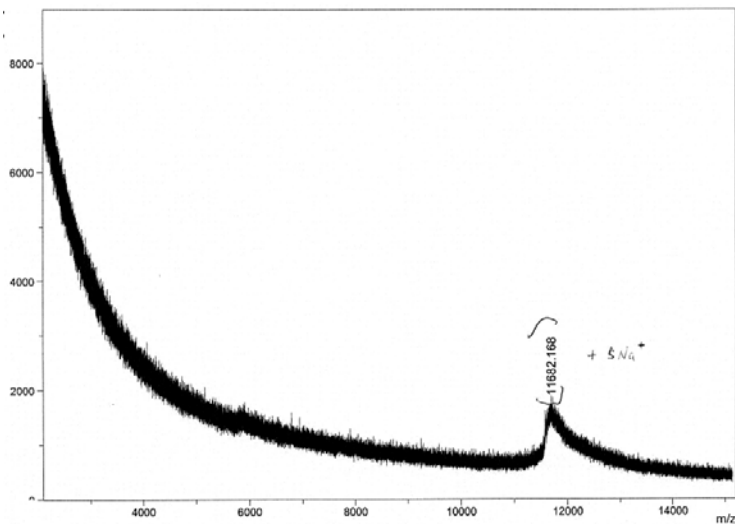

**Figure S1.4.** MALDI-TOF MS spectrum of ON 2.

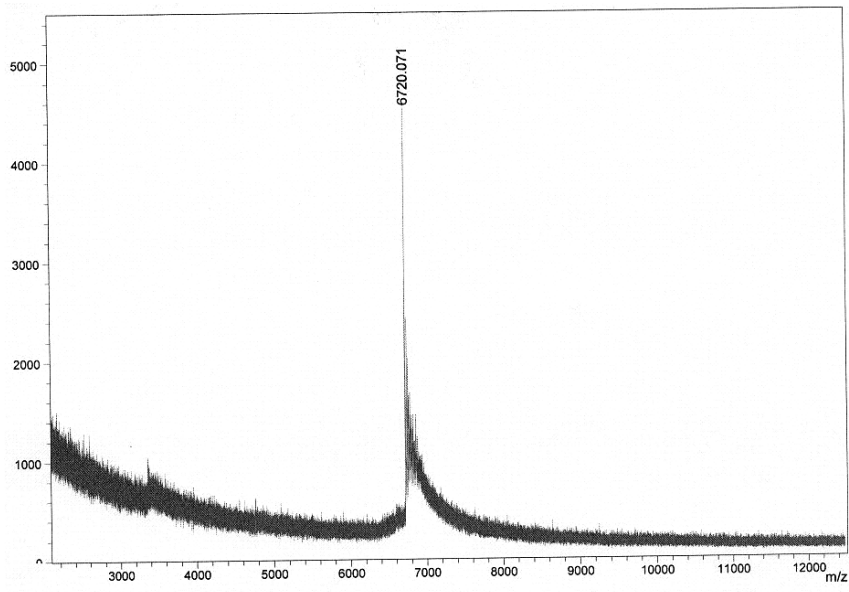

**Figure S1.5.** MALDI-TOF MS spectrum of ON 3.

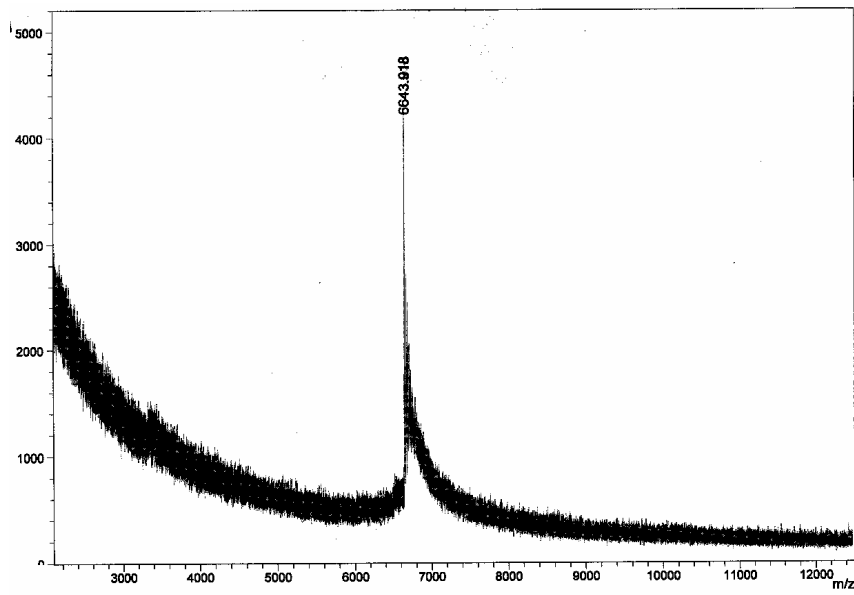

**Figure S1.6.** MALDI-TOF MS spectrum of ON 4.

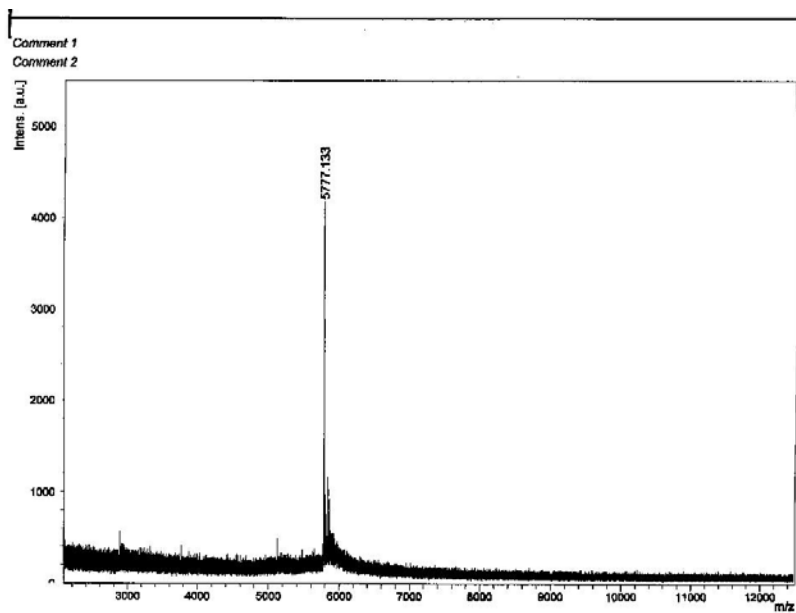

Figure S1.7. MALDI-TOF MS spectrum of ON 5.

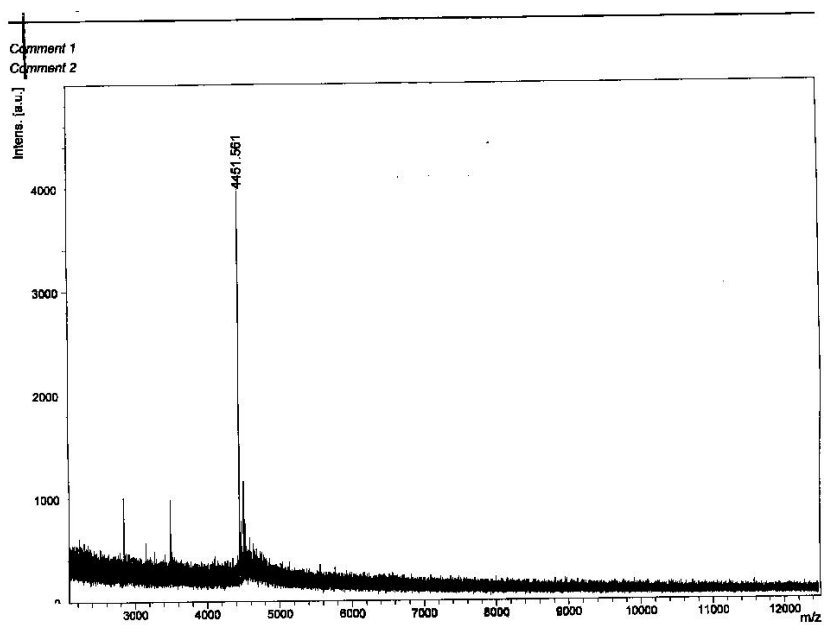

Figure S1.8. MALDI-TOF MS spectrum of ON 6.

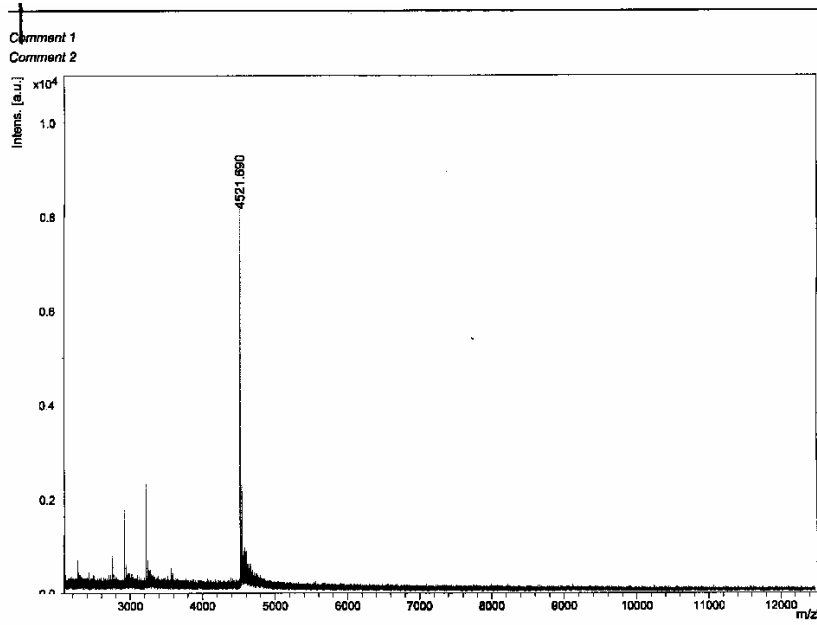

Figure S1.9. MALDI-TOF MS spectrums of ON 7.

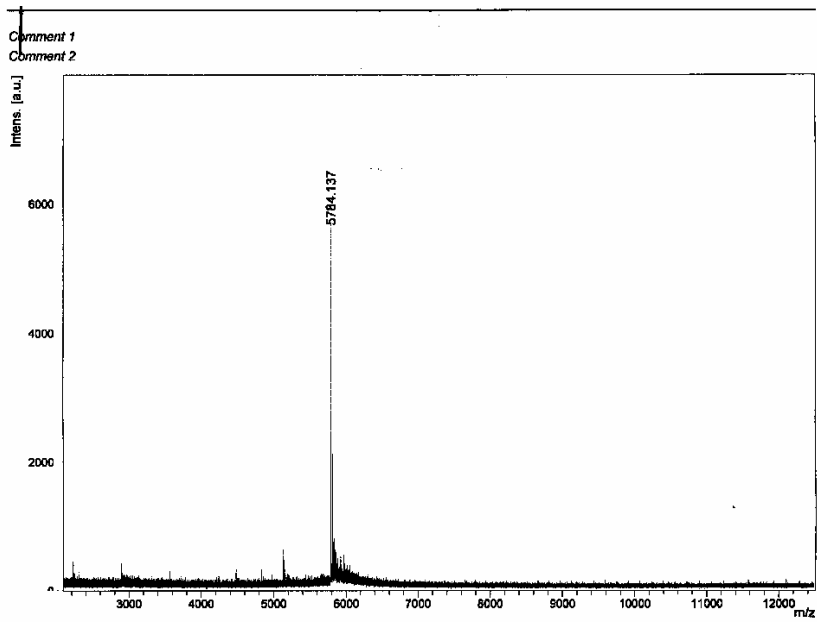

Figure S1.10. MALDI-TOF MS spectrums of ON 8...



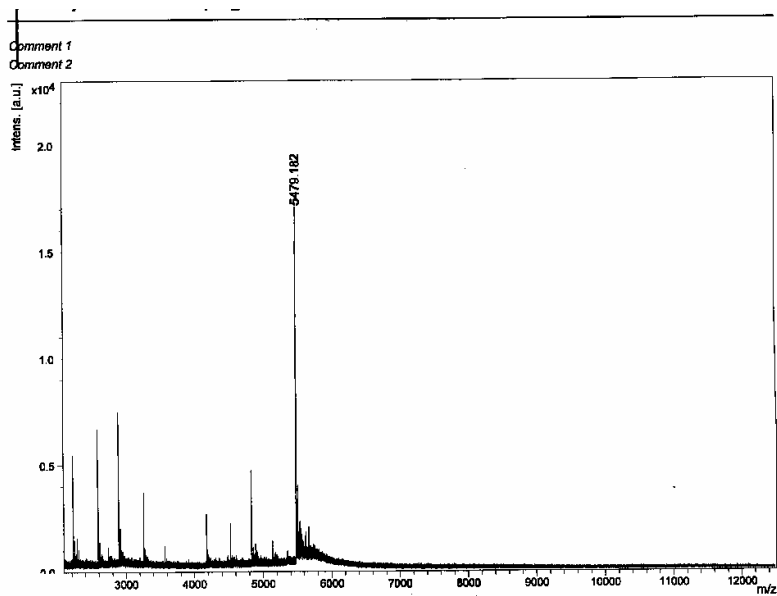

Figure S1.11. MALDI-TOF MS spectrums of ON 9.

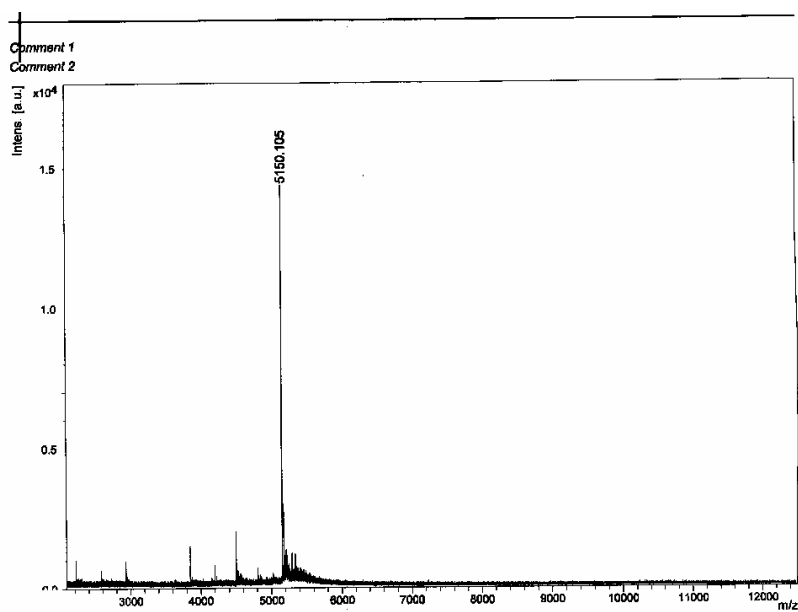

Figure S1.12. MALDI-TOF MS spectrums of ON 10.

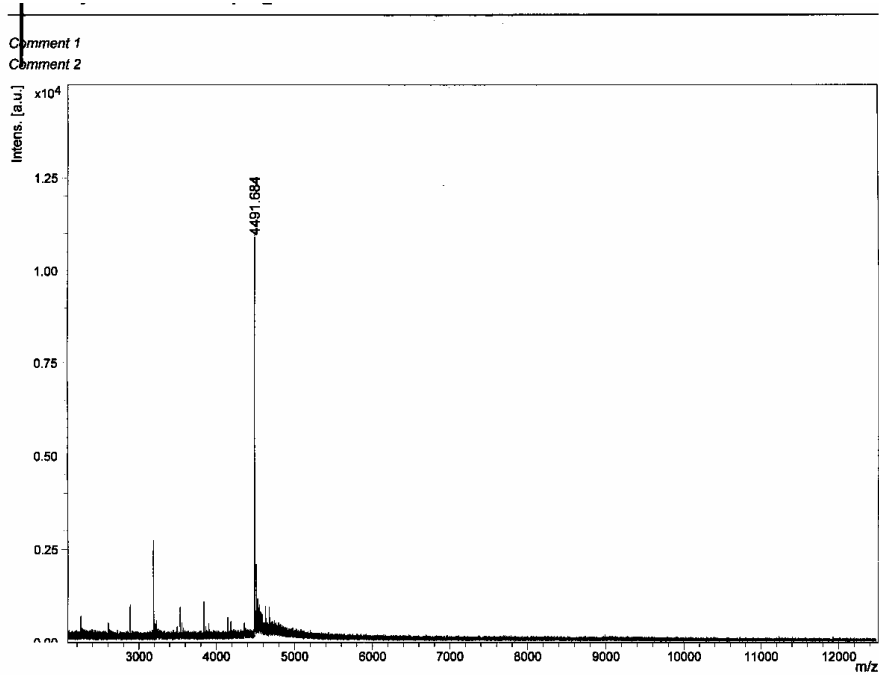

**Figure S1.13.** MALDI-TOF MS spectrums of ON 11.

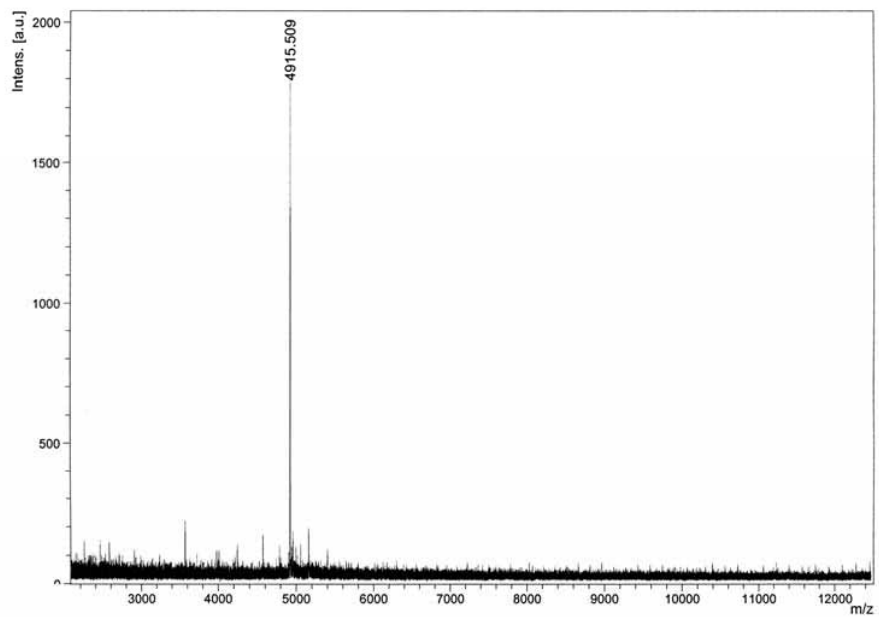

**Figure S1.14.** MALDI-TOF MS spectrums of ON 12.

**$^{31}\text{P}$  and  $^1\text{H}$  NMR spectra of phosphoramidite.**

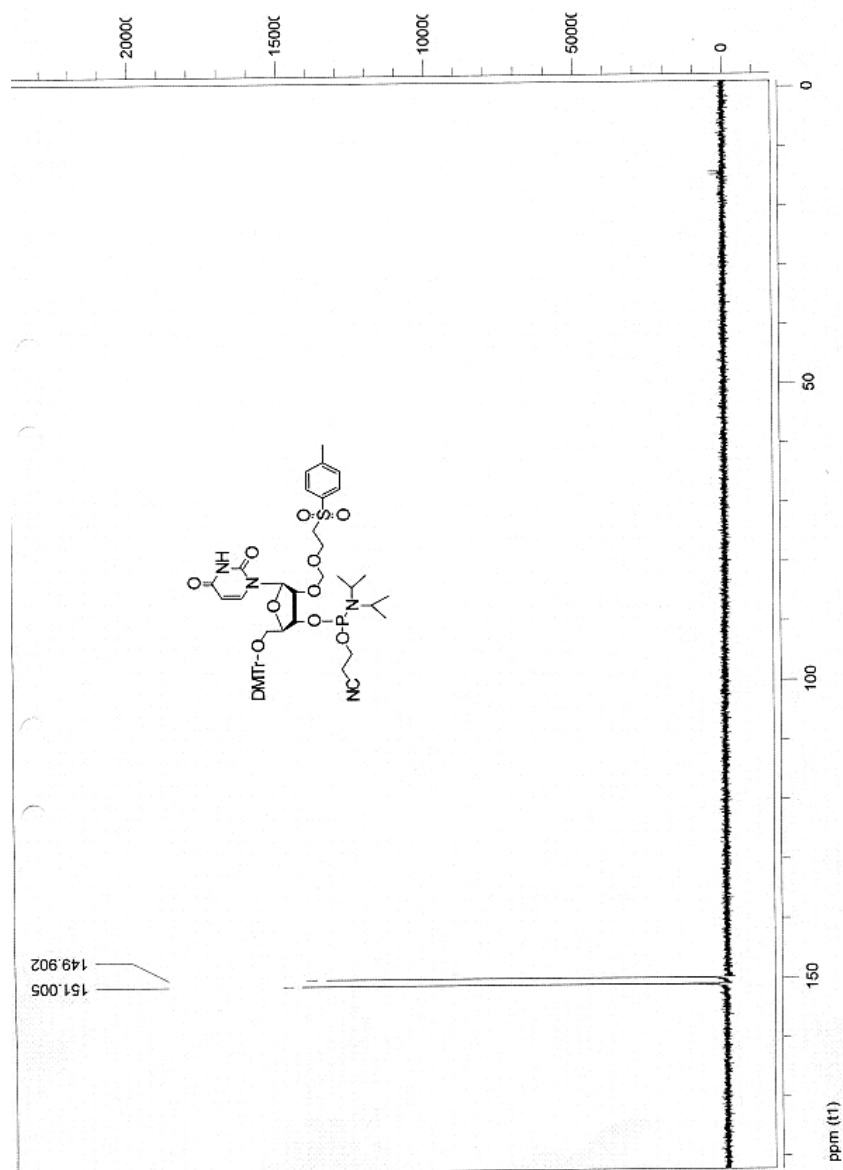

**Figure S2.1.**  $^{31}\text{P}$  NMR spectrum of uridine phosphoramidite.

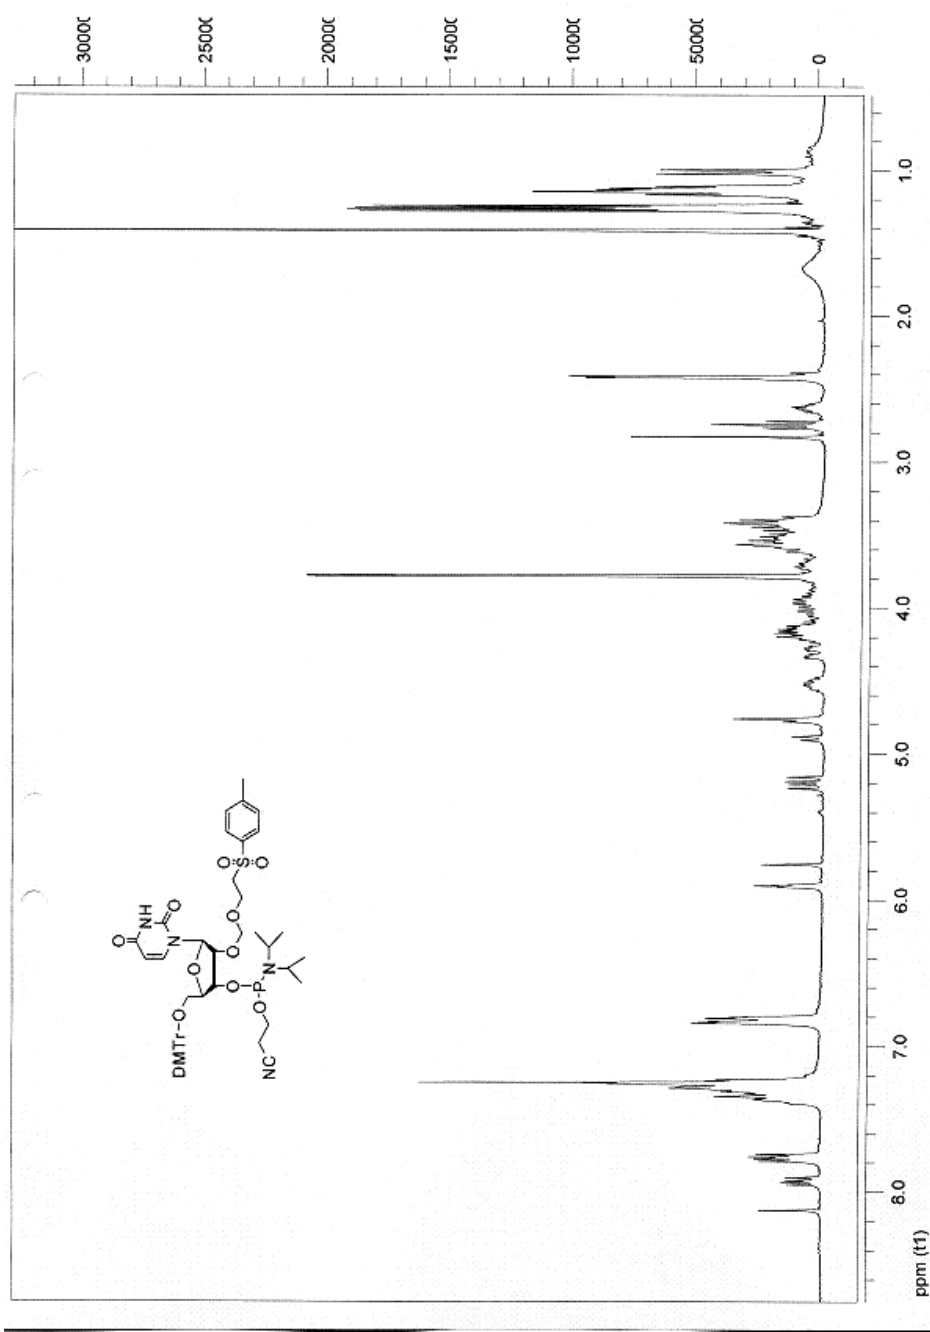

**Figure S2.2.** <sup>1</sup>H NMR spectrum of uridine phosphoramidite.

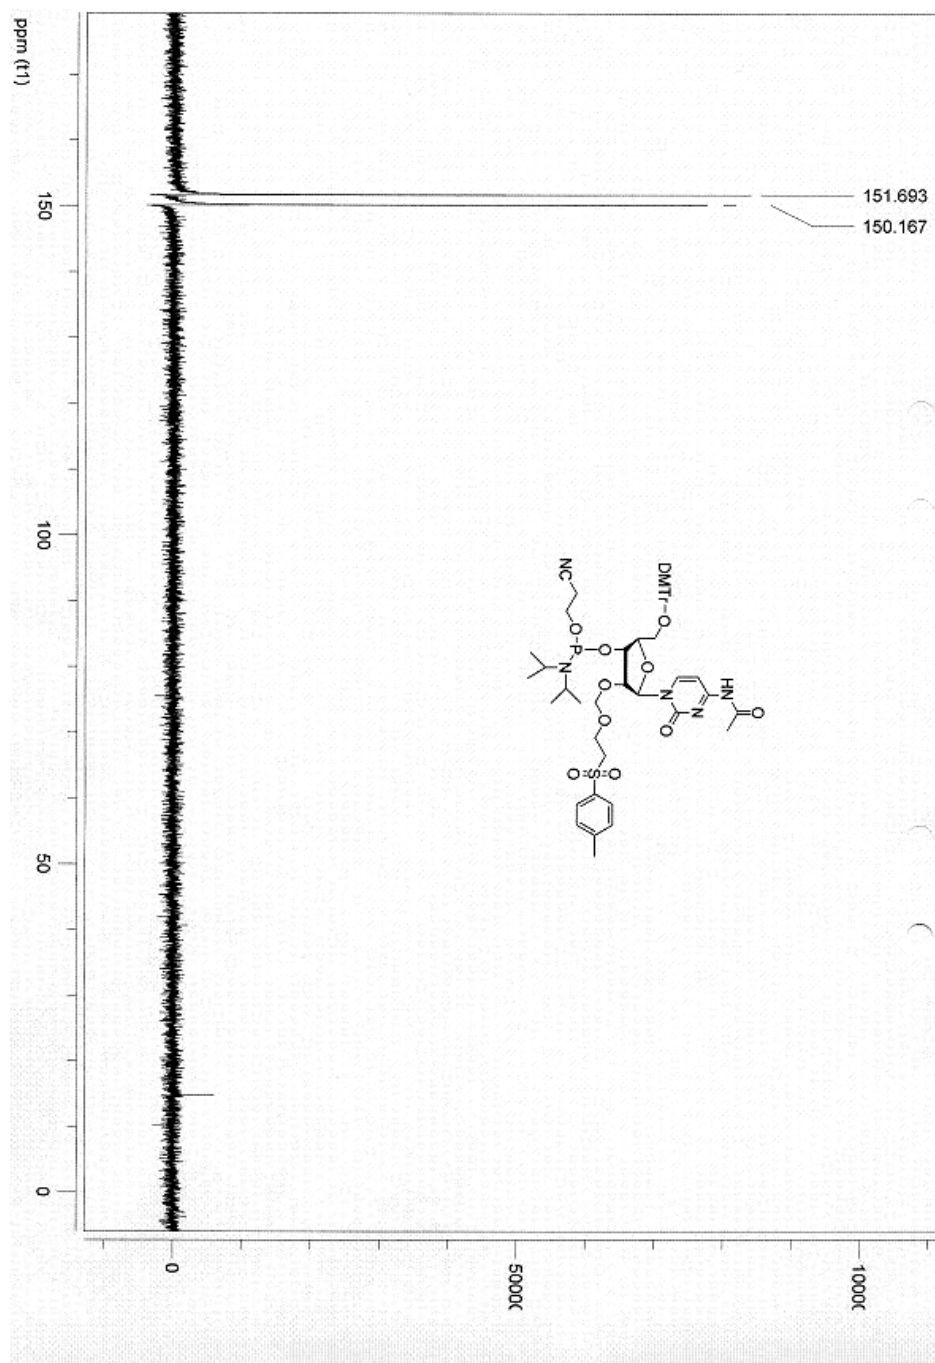

**Figure S2.3.**  $^{31}\text{P}$  NMR spectrum of cytidine phosphoramidite.

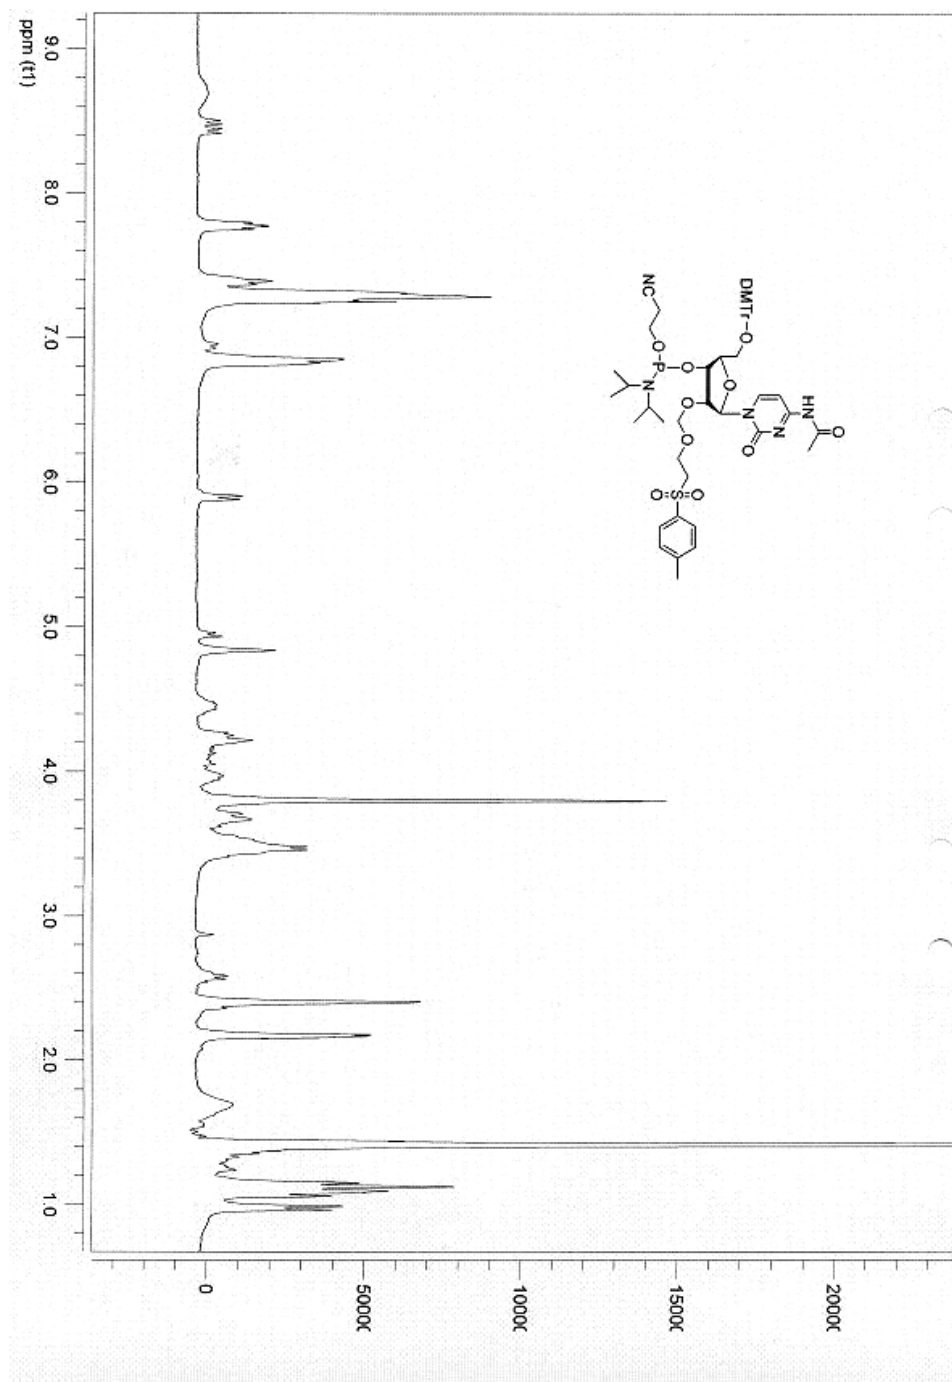

**Figure S2.4.** <sup>1</sup>H NMR spectrum of cytidine phosphoramidite.

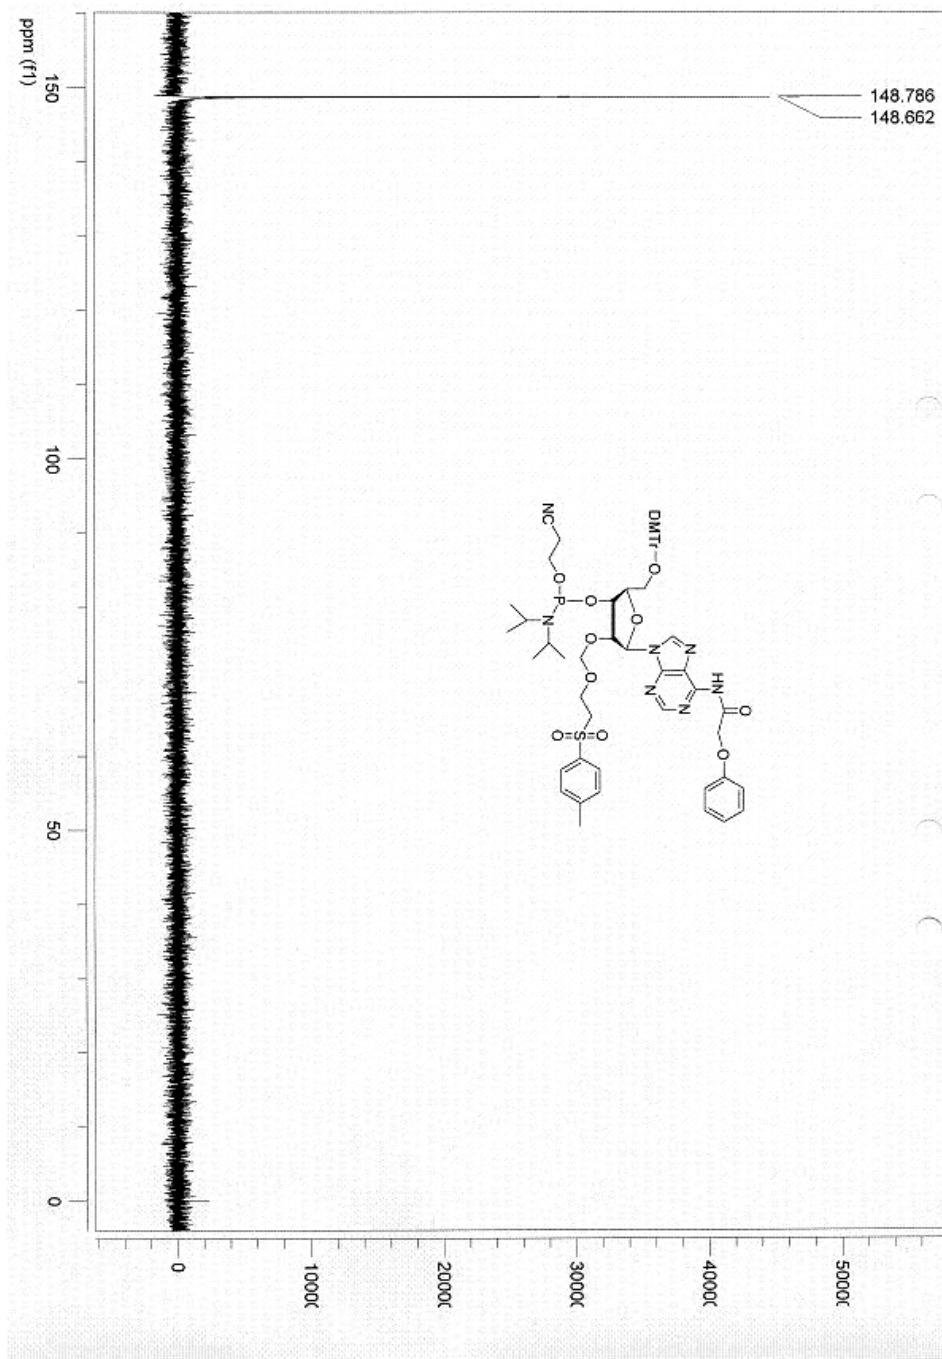

**Figure S2.5.**  $^{31}\text{P}$  NMR spectrum of adenosine phosphoramidite.

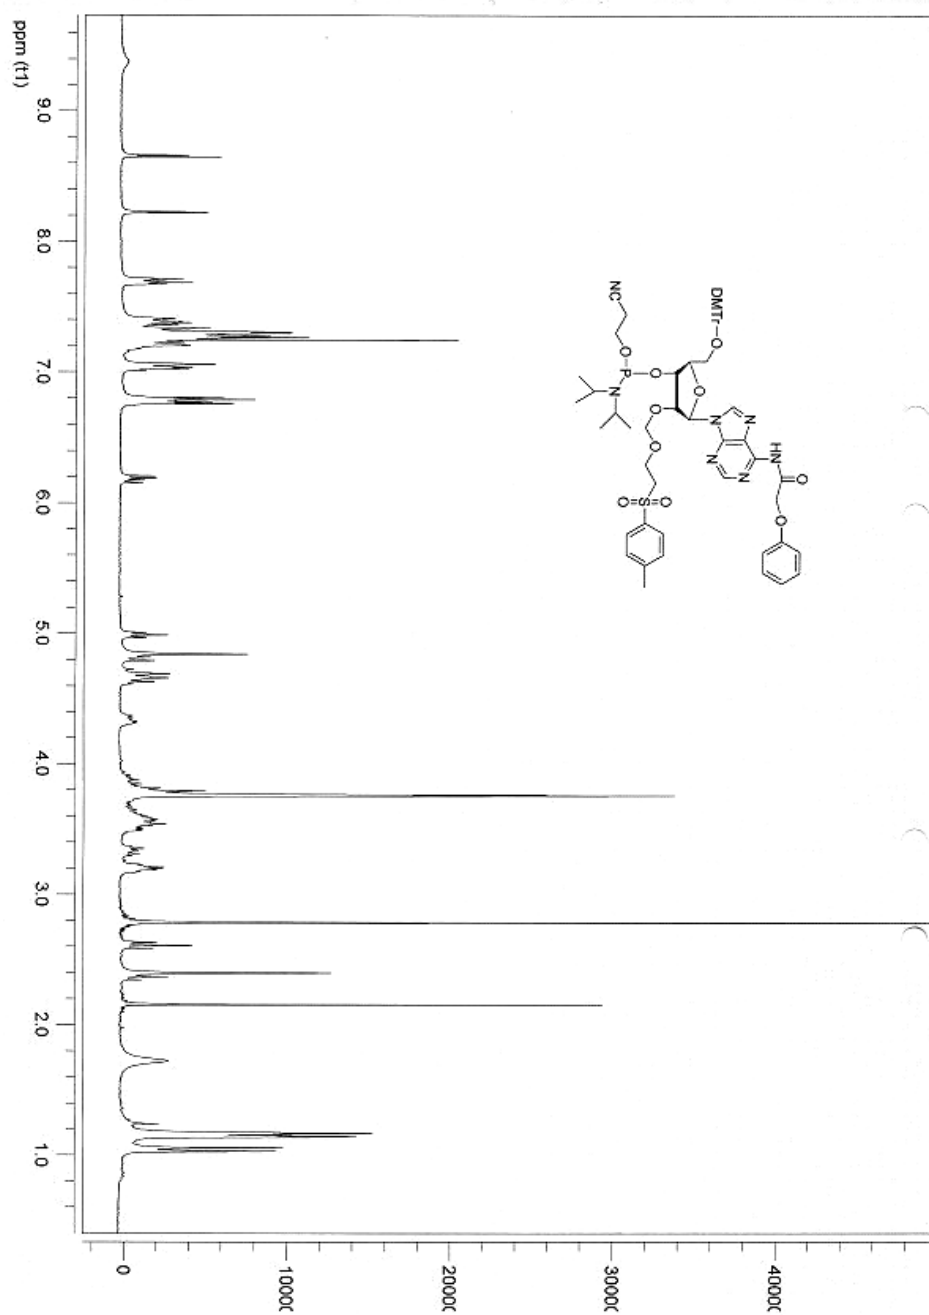

**Figure S2.6.**  $^1\text{H}$  NMR spectrum of adenosine phosphoramidite.



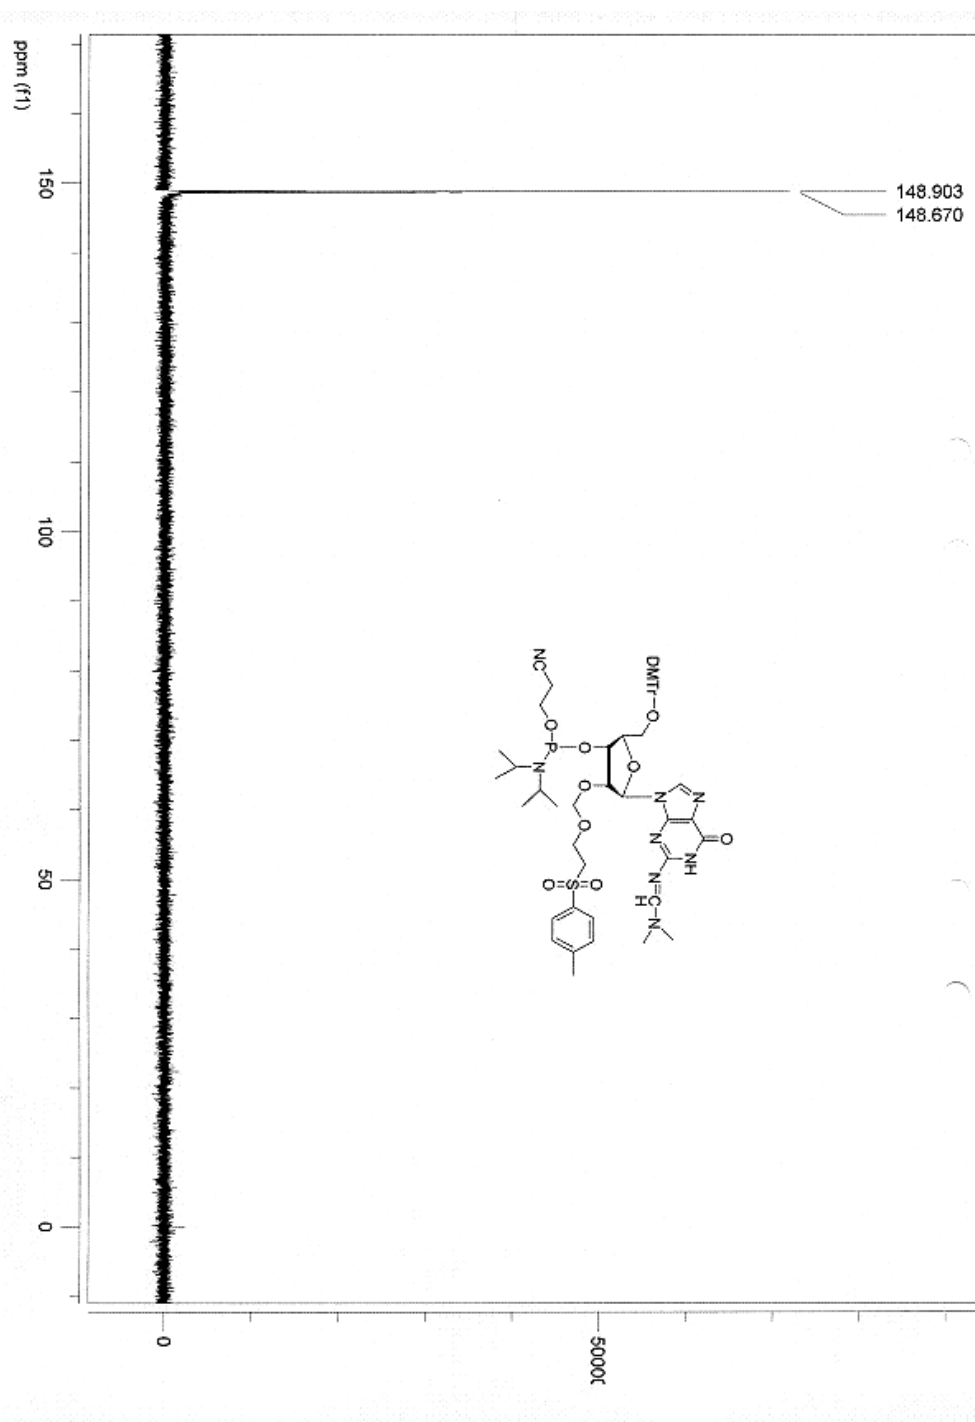

**Figure S2.7.**  $^{31}\text{P}$  NMR spectrum of guanosine phosphoramidite.

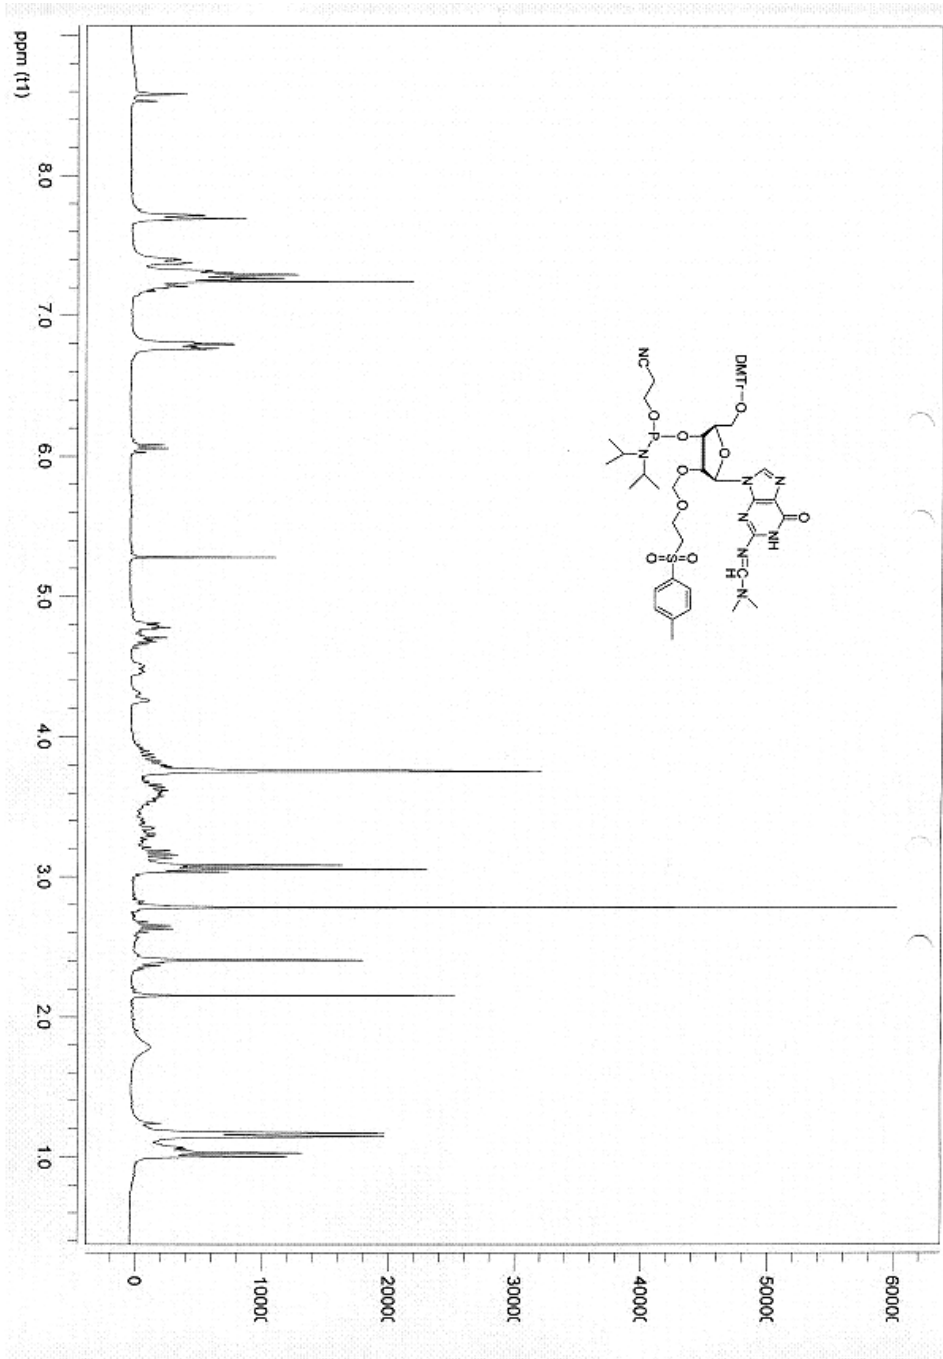

**Figure S2.8.**  $^1\text{H}$  NMR spectrum of guanosine phosphoramidite.

**$^1\text{H}$  and  $^{13}\text{C}$  NMR spectra of 5'-*O*-DMTr-2'-TEM nucleoside.**

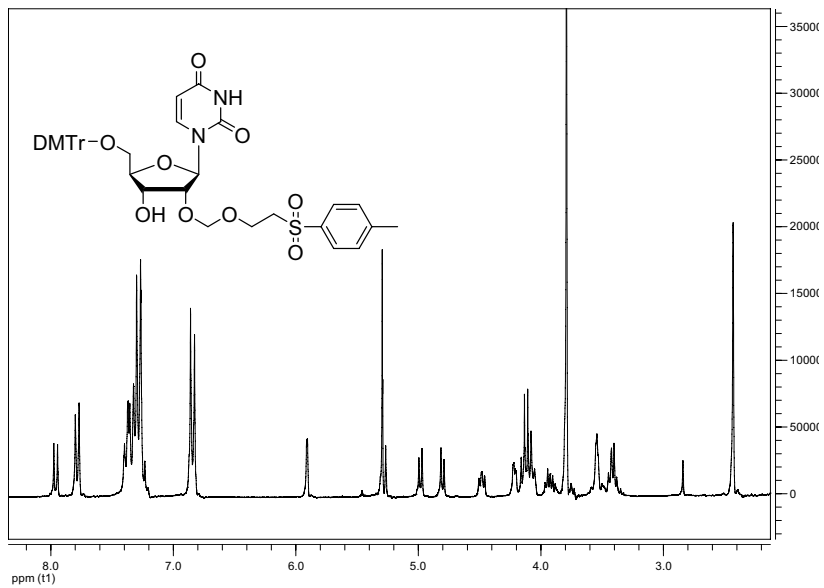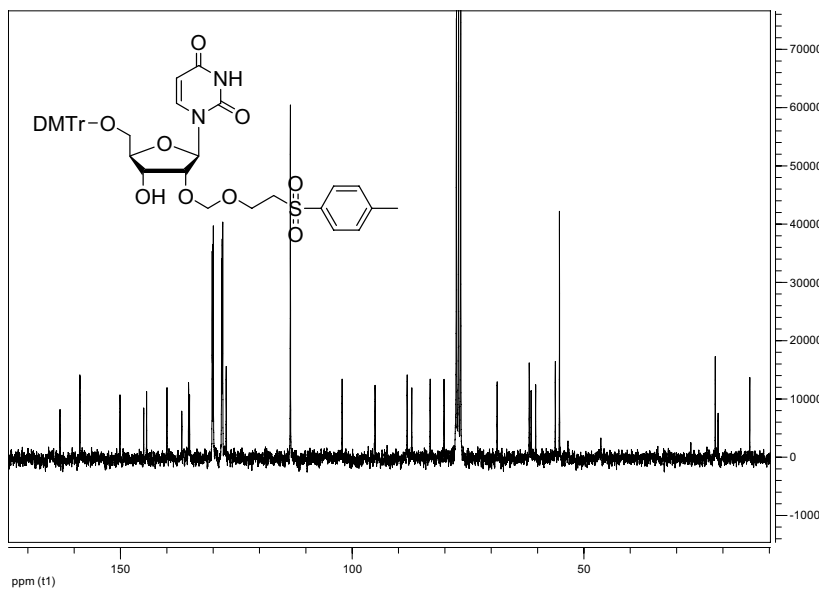

**Figure S2.9.**  $^1\text{H}$  and  $^{13}\text{C}$  NMR spectra of 5'-*O*-DMTr-2'-TEM uridine.

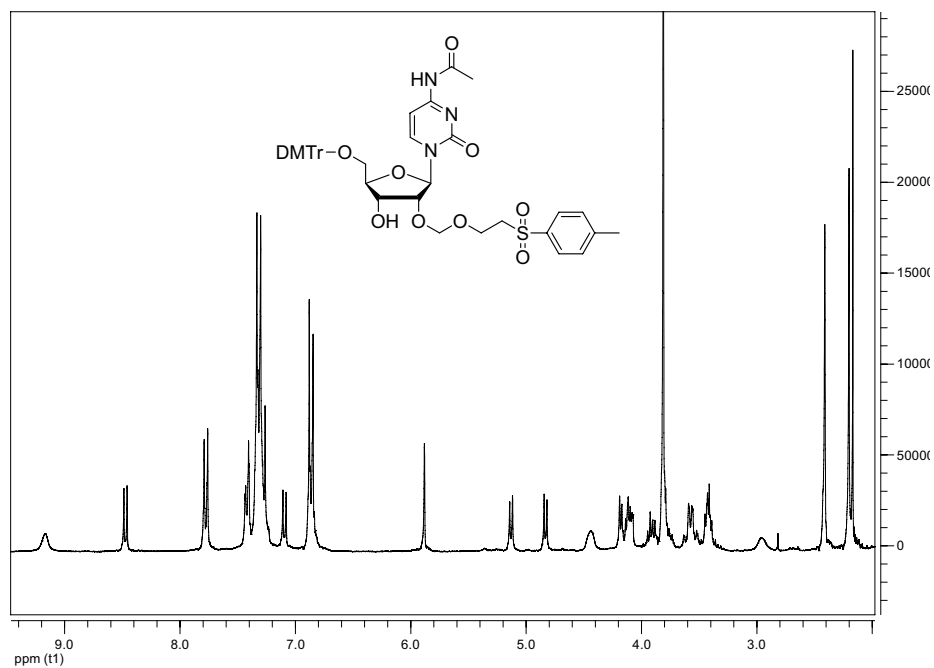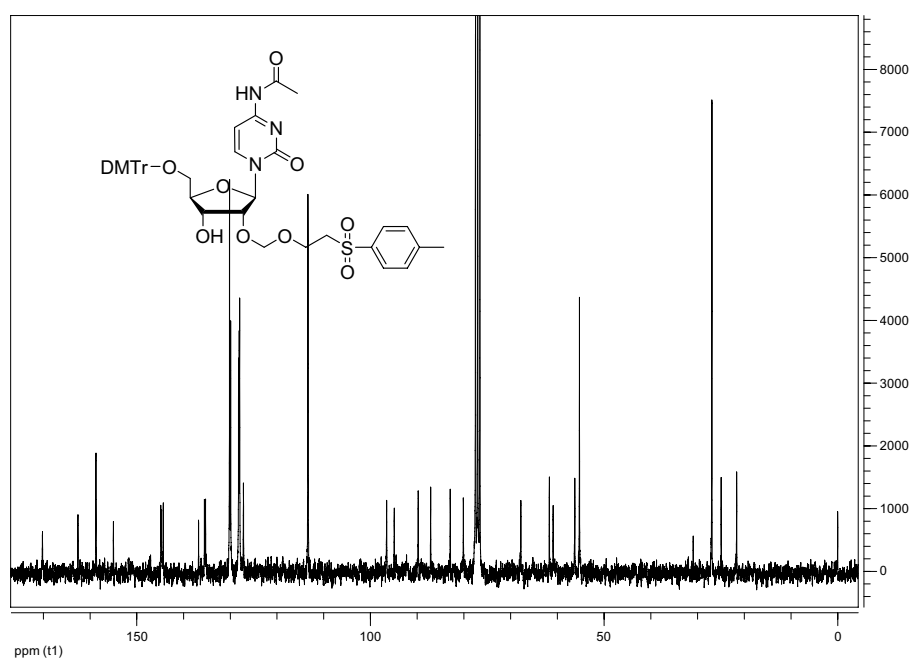

**Figure S2.10.**  $^1\text{H}$  and  $^{13}\text{C}$  NMR spectra of 5'-O-DMTr-2'-TEM cytidine.

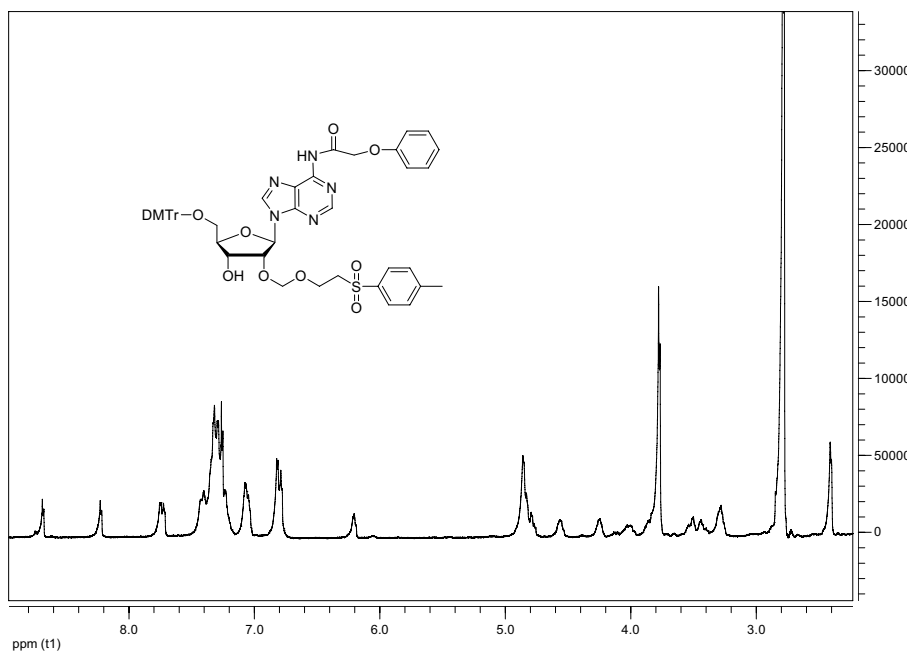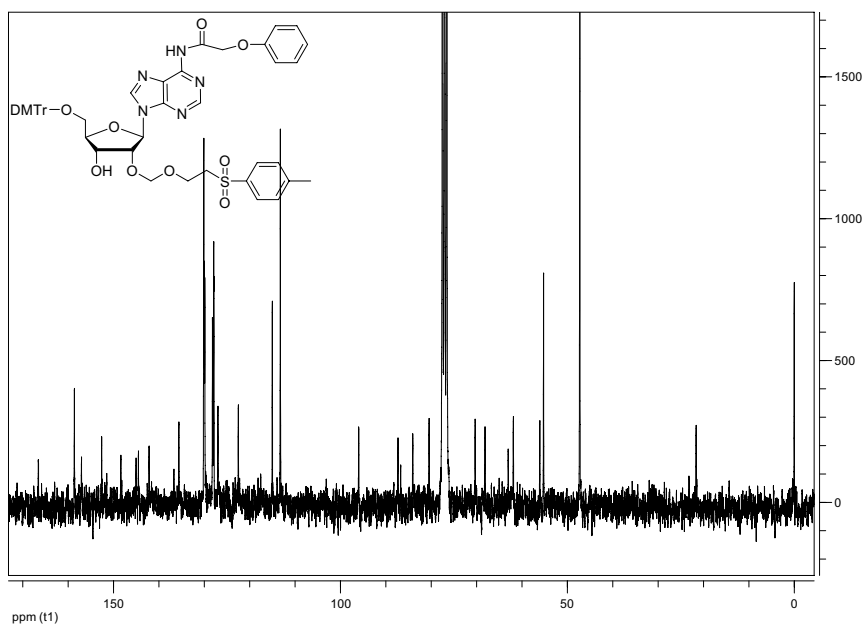

**Figure S2.11.**  $^1\text{H}$  and  $^{13}\text{C}$  NMR spectra of 5'-O-DMTr-2'-TEM adenosine.

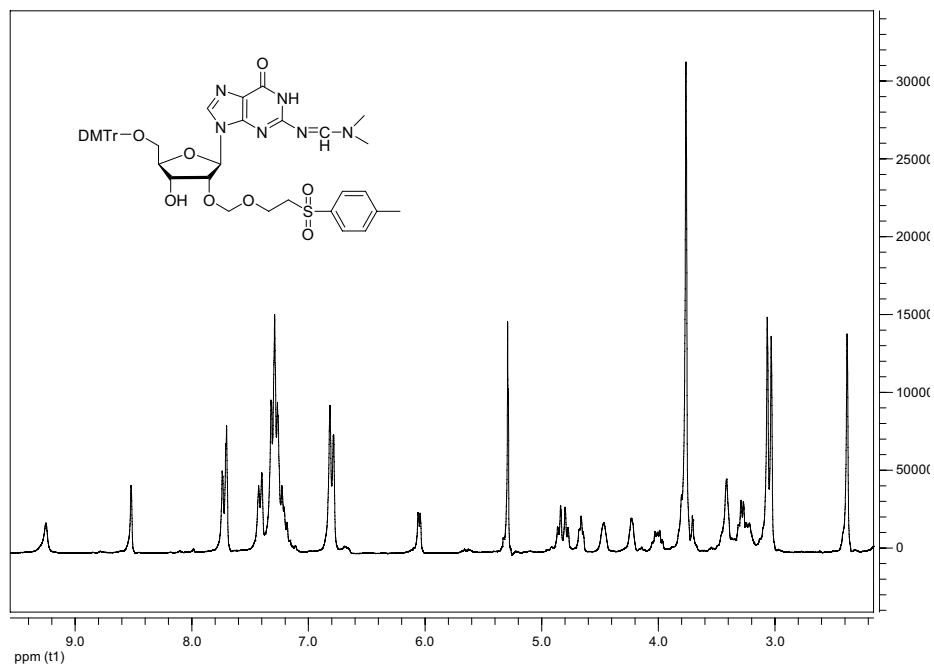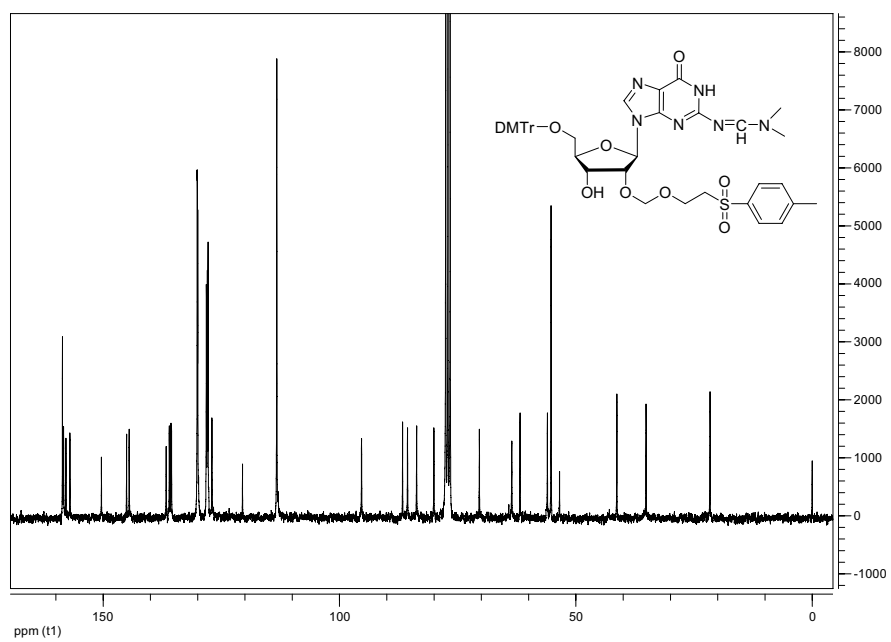

**Figure S2.12.**  $^1\text{H}$  and  $^{13}\text{C}$  NMR spectra of 5'-O-DMTr-2'-TEM guanosine.

### HPLC profiles of crude ON 3 and 4 under different unblocking conditions.

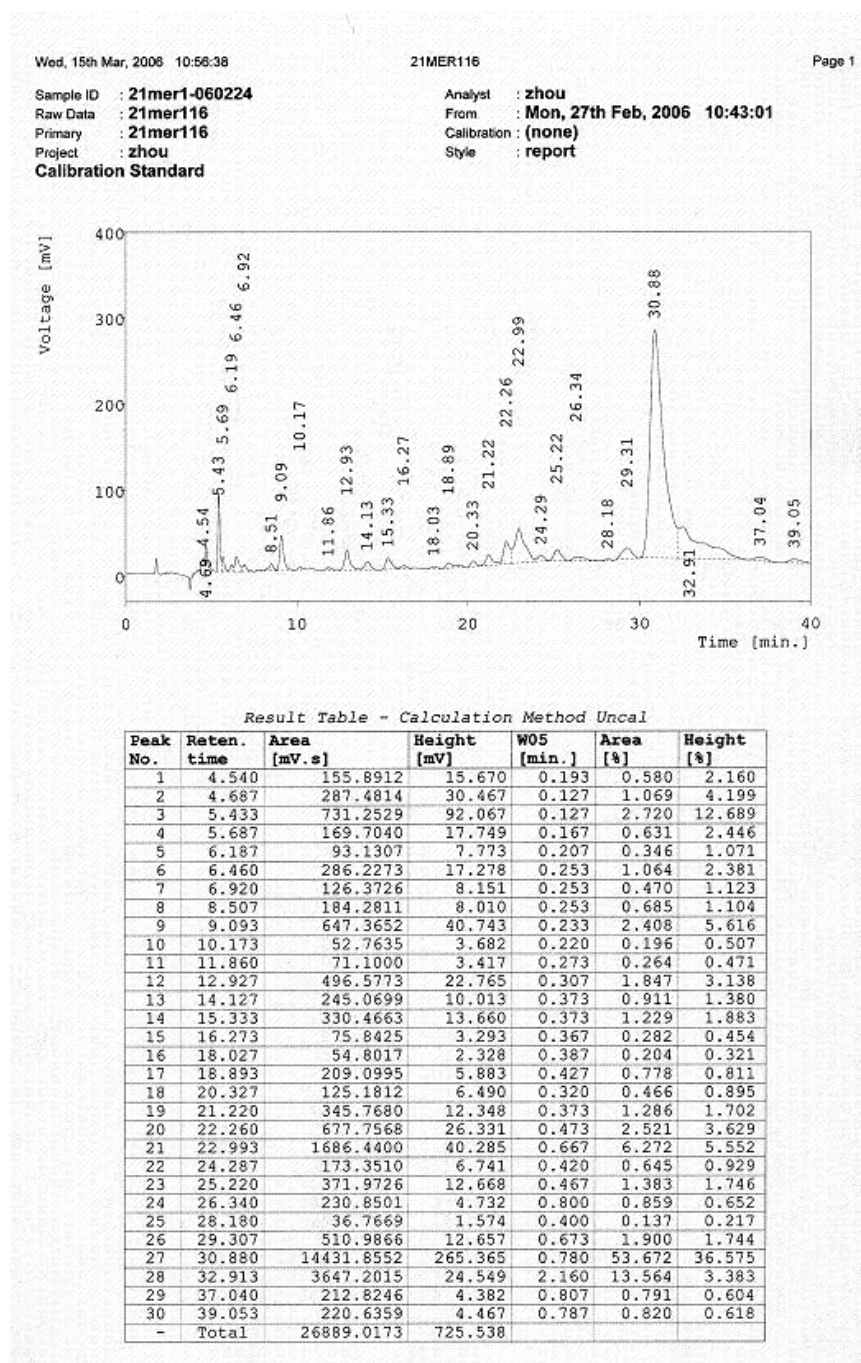

Figure S3.1

Sample ID : 21mer1-060224  
 Raw Data : 21mer117  
 Primary : 21mer117  
 Project : zhou  
 Calibration Standard

Analyst : zhou  
 From : Mon, 27th Feb, 2006 18:26:45  
 Calibration : (none)  
 Style : report

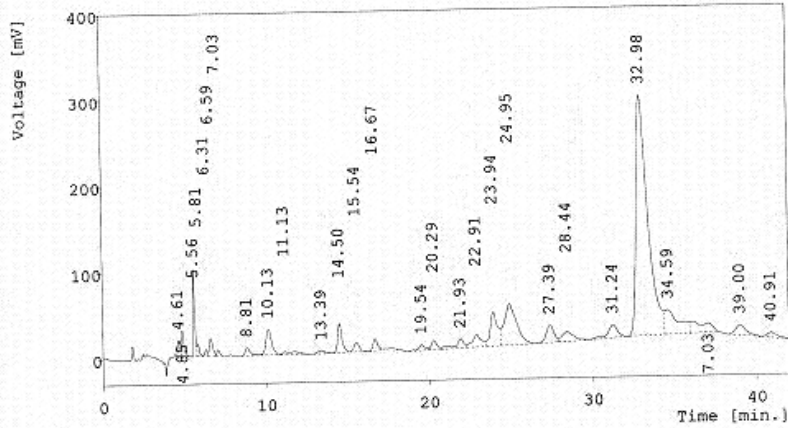

Result Table - Calculation Method Uncal

| Peak No. | Reten. time | Area [mV.s] | Height [mV] | W05 [min.] | Area [%] | Height [%] |
|----------|-------------|-------------|-------------|------------|----------|------------|
| 1        | 4.607       | 191.1781    | 18.272      | 0.193      | 0.671    | 2.236      |
| 2        | 4.853       | 276.1546    | 30.350      | 0.133      | 0.969    | 3.714      |
| 3        | 5.560       | 823.5623    | 100.948     | 0.127      | 2.889    | 12.352     |
| 4        | 5.807       | 133.8423    | 14.279      | 0.153      | 0.470    | 1.747      |
| 5        | 6.307       | 83.1497     | 7.603       | 0.200      | 0.292    | 0.930      |
| 6        | 6.587       | 297.7748    | 20.489      | 0.233      | 1.045    | 2.507      |
| 7        | 7.033       | 85.7459     | 6.946       | 0.187      | 0.301    | 0.850      |
| 8        | 8.813       | 195.4787    | 8.913       | 0.313      | 0.686    | 1.091      |
| 9        | 10.133      | 739.6879    | 30.317      | 0.360      | 2.595    | 3.710      |
| 10       | 11.133      | 185.4169    | 3.371       | 1.147      | 0.650    | 0.413      |
| 11       | 13.393      | 105.8221    | 3.484       | 0.460      | 0.371    | 0.426      |
| 12       | 14.500      | 627.8841    | 34.111      | 0.267      | 2.203    | 4.174      |
| 13       | 15.540      | 257.4576    | 10.975      | 0.353      | 0.903    | 1.343      |
| 14       | 16.673      | 260.5721    | 13.820      | 0.293      | 0.914    | 1.691      |
| 15       | 19.540      | 171.5488    | 6.547       | 0.373      | 0.602    | 0.801      |
| 16       | 20.287      | 251.4269    | 10.935      | 0.340      | 0.882    | 1.338      |
| 17       | 21.933      | 381.4677    | 10.857      | 0.380      | 1.338    | 1.328      |
| 18       | 22.907      | 591.8062    | 14.839      | 0.573      | 2.076    | 1.816      |
| 19       | 23.940      | 1211.0865   | 39.540      | 0.627      | 4.249    | 4.838      |
| 20       | 24.953      | 2540.6790   | 48.059      | 0.847      | 8.913    | 5.881      |
| 21       | 27.393      | 676.7945    | 20.289      | 0.520      | 2.374    | 2.483      |
| 22       | 28.440      | 553.6175    | 10.867      | 0.820      | 1.942    | 1.330      |
| 23       | 31.240      | 618.4824    | 15.207      | 0.553      | 2.170    | 1.861      |
| 24       | 32.980      | 13853.6421  | 279.492     | 0.713      | 48.603   | 34.199     |
| 25       | 34.593      | 1664.5863   | 28.437      | 0.760      | 5.840    | 3.480      |
| 26       | 37.033      | 932.4753    | 10.491      | 1.473      | 3.271    | 1.284      |
| 27       | 39.000      | 531.7612    | 12.042      | 0.640      | 1.866    | 1.473      |
| 28       | 40.907      | 260.8151    | 5.768       | 0.607      | 0.915    | 0.704      |
| -        | Total       | 28503.9167  | 817.252     |            |          |            |

Figure S3.2



Sample ID : 21mer1-0602220  
 Raw Data : 21mer118  
 Primary : 21mer118  
 Project : zhou  
 Calibration Standard

Analyst : zhou  
 From : Tue, 28th Feb, 2006 16:57:29  
 Calibration : (none)  
 Style : report

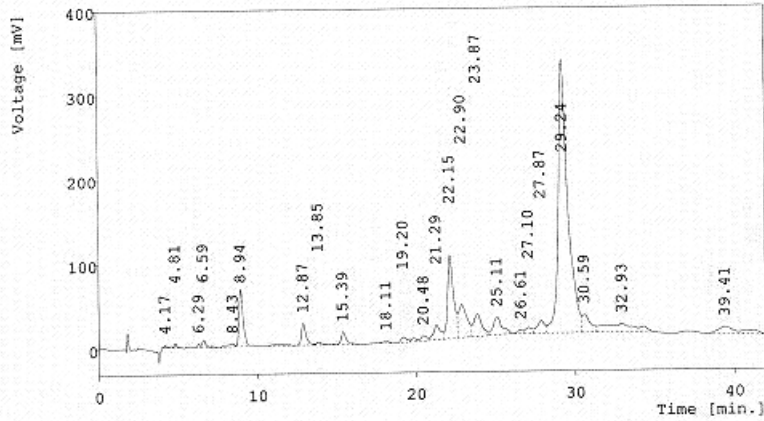

Result Table - Calculation Method Uncal

| Peak No. | Reten. time | Area [mV.s] | Height [mV] | W05 [min.] | Area [%] | Height [%] |
|----------|-------------|-------------|-------------|------------|----------|------------|
| 1        | 4.173       | 23.8749     | 3.811       | 0.107      | 0.089    | 0.515      |
| 2        | 4.813       | 73.6644     | 5.212       | 0.147      | 0.276    | 0.704      |
| 3        | 6.293       | 43.1082     | 3.995       | 0.200      | 0.161    | 0.540      |
| 4        | 6.593       | 163.3205    | 8.804       | 0.233      | 0.611    | 1.189      |
| 5        | 8.433       | 113.8712    | 2.841       | 0.700      | 0.426    | 0.384      |
| 6        | 8.940       | 1176.5041   | 66.540      | 0.267      | 4.403    | 8.990      |
| 7        | 12.873      | 614.9826    | 25.828      | 0.293      | 2.301    | 3.489      |
| 8        | 13.847      | 78.2672     | 3.254       | 0.360      | 0.293    | 0.440      |
| 9        | 15.393      | 342.9642    | 14.871      | 0.307      | 1.283    | 2.009      |
| 10       | 18.113      | 89.1900     | 2.819       | 0.407      | 0.334    | 0.381      |
| 11       | 19.200      | 159.4787    | 6.254       | 0.440      | 0.597    | 0.845      |
| 12       | 20.480      | 247.6766    | 6.347       | 0.440      | 0.927    | 0.857      |
| 13       | 21.293      | 536.2703    | 17.528      | 0.600      | 2.007    | 2.368      |
| 14       | 22.153      | 2585.9979   | 98.313      | 0.393      | 9.677    | 13.283     |
| 15       | 22.900      | 1482.9093   | 39.223      | 0.700      | 5.549    | 5.299      |
| 16       | 23.867      | 970.2492    | 26.299      | 0.613      | 3.631    | 3.553      |
| 17       | 25.107      | 812.9369    | 20.670      | 0.500      | 3.042    | 2.793      |
| 18       | 26.607      | 95.5991     | 4.071       | 0.407      | 0.358    | 0.550      |
| 19       | 27.100      | 193.6094    | 6.799       | 0.593      | 0.725    | 0.919      |
| 20       | 27.873      | 498.0154    | 14.767      | 0.613      | 1.864    | 1.995      |
| 21       | 29.240      | 13472.1677  | 323.559     | 0.547      | 50.414   | 43.715     |
| 22       | 30.587      | 759.4316    | 20.897      | 0.540      | 2.842    | 2.823      |
| 23       | 32.933      | 1328.3291   | 9.465       | 2.480      | 4.971    | 1.279      |
| 24       | 39.407      | 860.6606    | 7.989       | 1.067      | 3.219    | 1.080      |
| -        | Total       | 26723.0791  | 740.153     |            |          |            |

③

Figure S3.3.

Sample ID : 21mer2-0602224  
 Raw Data : 21mer2-2  
 Primary : 21mer2-2  
 Project : zhou  
 Calibration Standard

Analyst : zhou  
 From : Wed, 1st Mar, 2006 15:51:47  
 Calibration : (none)  
 Style : report

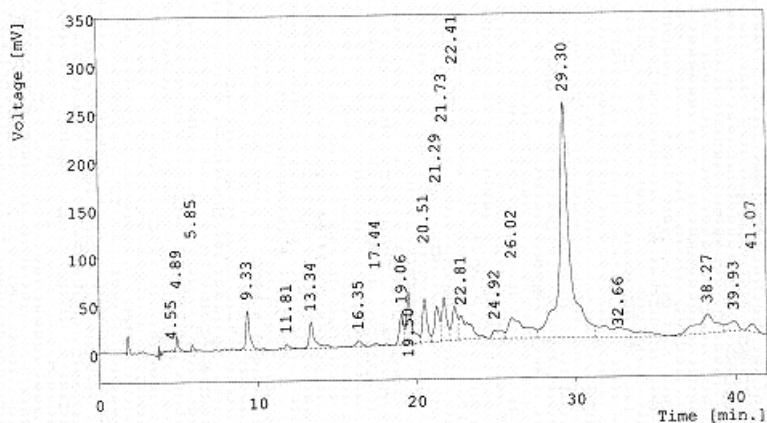

Result Table - Calculation Method Uncal

| Peak No. | Reten. time | Area [mV.s] | Height [mV] | W05 [min.] | Area [%] | Height [%] |
|----------|-------------|-------------|-------------|------------|----------|------------|
| 1        | 4.547       | 11.2822     | 0.927       | 0.193      | 0.043    | 0.133      |
| 2        | 4.887       | 156.6739    | 15.580      | 0.127      | 0.598    | 2.230      |
| 3        | 5.853       | 68.1481     | 6.254       | 0.160      | 0.260    | 0.895      |
| 4        | 9.327       | 811.1541    | 40.421      | 0.220      | 3.095    | 5.785      |
| 5        | 11.807      | 123.9648    | 5.346       | 0.247      | 0.473    | 0.765      |
| 6        | 13.340      | 676.7147    | 26.856      | 0.280      | 2.582    | 3.844      |
| 7        | 16.347      | 174.7687    | 6.070       | 0.380      | 0.667    | 0.869      |
| 8        | 17.440      | 94.6245     | 2.866       | 0.333      | 0.361    | 0.410      |
| 9        | 19.060      | 584.6438    | 31.029      | 0.340      | 2.231    | 4.441      |
| 10       | 19.500      | 1234.5845   | 54.016      | 0.287      | 4.710    | 7.731      |
| 11       | 20.513      | 940.1233    | 45.503      | 0.307      | 3.587    | 6.512      |
| 12       | 21.287      | 776.1521    | 36.325      | 0.387      | 2.961    | 5.199      |
| 13       | 21.727      | 978.9635    | 44.829      | 0.360      | 3.735    | 6.416      |
| 14       | 22.407      | 824.3803    | 34.655      | 0.440      | 3.145    | 4.960      |
| 15       | 22.813      | 1130.5995   | 24.638      | 0.880      | 4.313    | 3.526      |
| 16       | 24.920      | 367.1730    | 8.495       | 0.820      | 1.401    | 1.216      |
| 17       | 26.020      | 1631.0312   | 20.856      | 1.600      | 6.223    | 2.985      |
| 18       | 29.300      | 11447.0512  | 245.303     | 0.487      | 43.673   | 35.107     |
| 19       | 32.660      | 1709.7145   | 10.220      | 2.327      | 6.523    | 1.463      |
| 20       | 38.267      | 1687.0722   | 19.888      | 1.160      | 6.437    | 2.846      |
| 21       | 39.933      | 500.3685    | 10.376      | 0.933      | 1.909    | 1.485      |
| 22       | 41.067      | 281.6484    | 8.278       | 0.540      | 1.073    | 1.182      |
| -        | Total       | 26210.8369  | 698.729     |            |          |            |

Figure S3.4.

Sample ID : 21mer1-0602220  
 Raw Data : 21mer119  
 Primary : 21mer119  
 Project : zhou  
**Calibration Standard**

Analyst : zhou  
 From : Fri, 3rd Mar, 2006 11:43:34  
 Calibration : (none)  
 Style : report

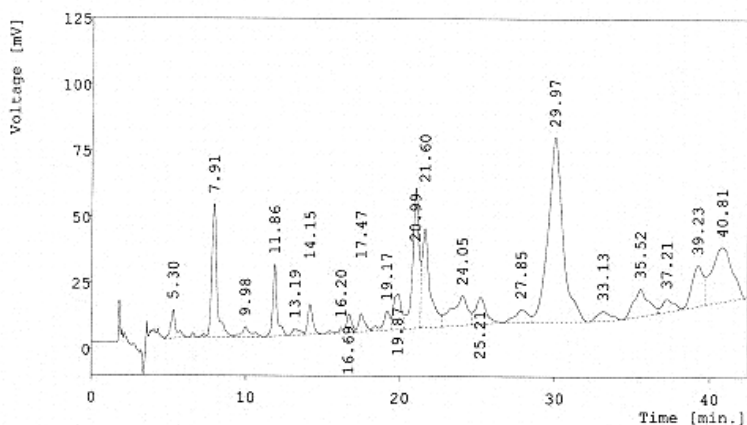

Result Table - Calculation Method Uncal

| Peak No. | Reten. time | Area [mV.s] | Height [mV] | W05 [min.] | Area [%] | Height [%] |
|----------|-------------|-------------|-------------|------------|----------|------------|
| 1        | 5.300       | 256.5522    | 10.717      | 0.293      | 1.543    | 2.796      |
| 2        | 7.913       | 1234.1828   | 50.494      | 0.320      | 7.424    | 13.172     |
| 3        | 9.980       | 166.2121    | 3.894       | 0.373      | 1.000    | 1.016      |
| 4        | 11.860      | 521.3368    | 27.197      | 0.240      | 3.136    | 7.095      |
| 5        | 13.187      | 79.9868     | 2.484       | 0.613      | 0.481    | 0.648      |
| 6        | 14.147      | 258.5239    | 11.434      | 0.333      | 1.555    | 2.983      |
| 7        | 16.200      | 59.7749     | 1.872       | 0.307      | 0.360    | 0.488      |
| 8        | 16.687      | 164.2585    | 7.021       | 0.353      | 0.988    | 1.831      |
| 9        | 17.473      | 184.6807    | 6.721       | 0.420      | 1.111    | 1.753      |
| 10       | 19.167      | 223.6841    | 7.214       | 0.440      | 1.346    | 1.882      |
| 11       | 19.873      | 487.3455    | 13.348      | 0.600      | 2.932    | 3.482      |
| 12       | 20.993      | 1502.3377   | 52.872      | 0.460      | 9.037    | 13.792     |
| 13       | 21.600      | 1358.7590   | 37.439      | 0.513      | 8.174    | 9.766      |
| 14       | 24.053      | 795.0137    | 11.139      | 1.307      | 4.782    | 2.906      |
| 15       | 25.207      | 499.0604    | 10.124      | 0.733      | 3.002    | 2.641      |
| 16       | 27.853      | 293.8092    | 4.952       | 1.027      | 1.767    | 1.292      |
| 17       | 29.973      | 4630.5768   | 69.620      | 0.920      | 27.855   | 18.161     |
| 18       | 33.127      | 221.1330    | 3.510       | 1.173      | 1.330    | 0.916      |
| 19       | 35.520      | 682.3452    | 10.232      | 1.213      | 4.105    | 2.669      |
| 20       | 37.213      | 254.6058    | 4.749       | 1.033      | 1.532    | 1.239      |
| 21       | 39.233      | 809.6426    | 15.604      | 0.933      | 4.870    | 4.071      |
| 22       | 40.813      | 1940.0089   | 20.713      | 1.647      | 11.670   | 5.401      |
| -        | Total       | 16623.8304  | 383.352     |            |          |            |

Figure S3.5.

Sample ID : 21mer1-0602220  
 Raw Data : 21mer120  
 Primary : 21mer120  
 Project : zhou  
**Calibration Standard**

Analyst : zhou  
 From : Fri, 3rd Mar, 2006 16:01:23  
 Calibration : (none)  
 Style : report

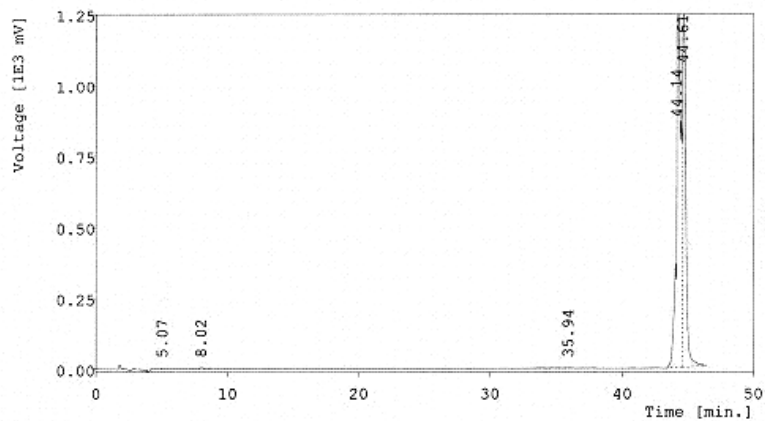

Result Table - Calculation Method Uncal

| Peak No. | Reten. time | Area [mV.s] | Height [mV] | W05 [min.] | Area [%] | Height [%] |
|----------|-------------|-------------|-------------|------------|----------|------------|
| 1        | 5.073       | 24.7464     | 2.654       | 0.140      | 0.046    | 0.106      |
| 2        | 8.020       | 130.7722    | 4.335       | 0.287      | 0.243    | 0.174      |
| 3        | 35.940      | 158.1237    | 1.372       | 0.440      | 0.294    | 0.055      |
| 4        | 44.140      | 31381.1747  | 1244.607    | 0.433      | 58.310   | 49.861     |
| 5        | 44.607      | 22123.3315  | 1243.167    | 0.280      | 41.107   | 49.804     |
| -        | Total       | 53818.1486  | 2496.134    |            |          |            |

Figure S3.6.

Sample ID : 21mer1-0602224  
 Raw Data : 21mer121  
 Primary : 21mer121  
 Project : zhou  
 Calibration Standard

Analyst : zhou  
 From : Mon, 6th Mar, 2006 16:26:13  
 Calibration : (none)  
 Style : report

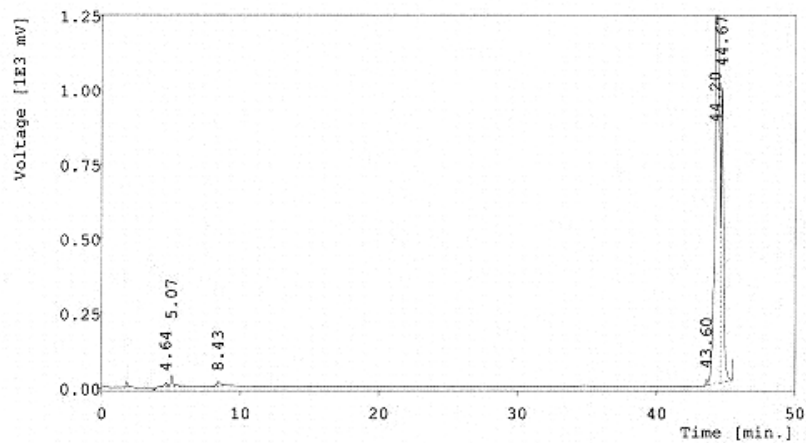

Result Table - Calculation Method Uncal

| Peak No. | Reten. time | Area [mV.s] | Height [mV] | W05 [min.] | Area [%] | Height [%] |
|----------|-------------|-------------|-------------|------------|----------|------------|
| 1        | 4.640       | 111.3069    | 12.776      | 0.113      | 0.254    | 0.554      |
| 2        | 5.067       | 435.5824    | 35.129      | 0.147      | 0.993    | 1.523      |
| 3        | 8.427       | 260.7563    | 13.332      | 0.287      | 0.594    | 0.578      |
| 4        | 43.600      | 150.3732    | 20.127      | 0.147      | 0.343    | 0.873      |
| 5        | 44.200      | 30176.1408  | 1237.310    | 0.407      | 68.796   | 53.637     |
| 6        | 44.673      | 12728.7824  | 988.148     | 0.213      | 29.020   | 42.835     |
| -        | Total       | 43862.9420  | 2306.822    |            |          |            |

Figure S3.7.

Sample ID : 21mer1-0602224  
Raw Data : 21mer122  
Primary : 21mer122  
Project : zhou  
Calibration Standard

Analyst : zhou  
From : Tue, 7th Mar, 2006 11:39:40  
Calibration : (none)  
Style : report

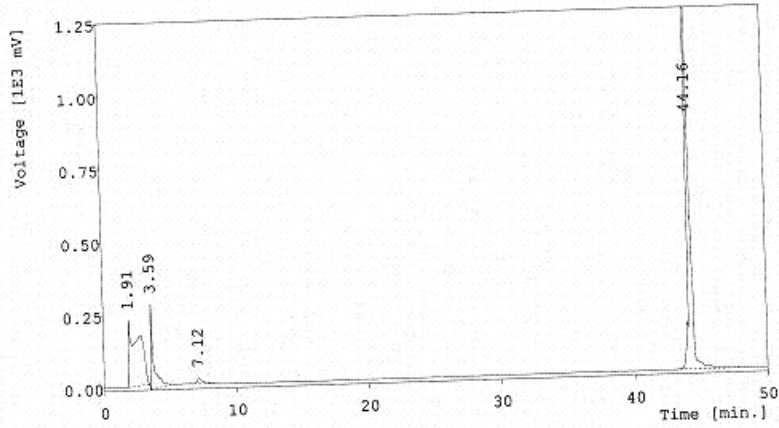

Result Table - Calculation Method Uncal

| Peak No. | Reten. time | Area [mV.s] | Height [mV] | W05 [min.] | Area [%] | Height [%] |
|----------|-------------|-------------|-------------|------------|----------|------------|
| 1        | 1.907       | 12158.8576  | 230.570     | 1.200      | 31.212   | 12.887     |
| 2        | 3.593       | 4111.0340   | 293.787     | 0.127      | 10.553   | 16.420     |
| 3        | 7.120       | 604.8310    | 18.872      | 0.360      | 1.553    | 1.055      |
| 4        | 44.160      | 22081.0828  | 1246.000    | 0.227      | 56.682   | 69.638     |
| -        | Total       | 38955.8054  | 1789.230    |            |          |            |

Figure S3.8.

8

Sample ID : 21mer1-0602224  
 Raw Data : 21mer123  
 Primary : 21mer123  
 Project : zhou  
 Calibration Standard

Analyst : zhou  
 From : Tue, 7th Mar, 2006 20:06:34  
 Calibration : (none)  
 Style : report

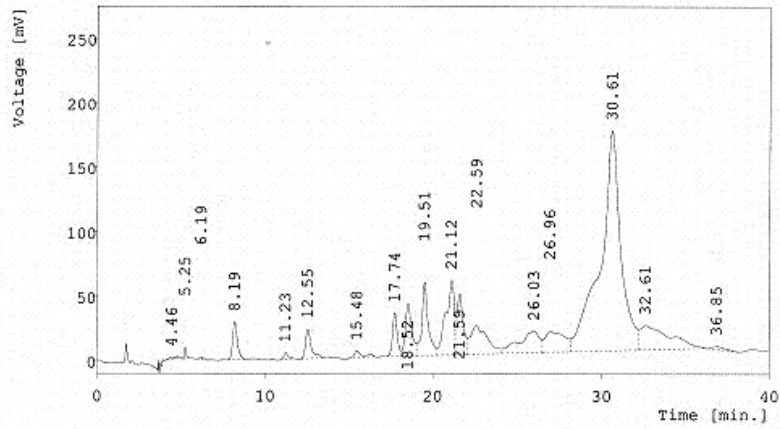

Result Table - Calculation Method Uncal

| Peak No. | Reten. time | Area [mV.s] | Height [mV] | W05 [min.] | Area [%] | Height [%] |
|----------|-------------|-------------|-------------|------------|----------|------------|
| 1        | 4.460       | 49.3355     | 1.687       | 0.667      | 0.168    | 0.299      |
| 2        | 5.247       | 70.6843     | 9.199       | 0.120      | 0.241    | 1.633      |
| 3        | 6.193       | 30.5340     | 1.813       | 0.220      | 0.104    | 0.322      |
| 4        | 8.187       | 566.2155    | 29.502      | 0.287      | 1.933    | 5.238      |
| 5        | 11.227      | 95.2518     | 5.294       | 0.267      | 0.325    | 0.940      |
| 6        | 12.553      | 542.5773    | 23.343      | 0.313      | 1.852    | 4.144      |
| 7        | 15.480      | 186.3593    | 5.769       | 0.340      | 0.636    | 1.024      |
| 8        | 17.740      | 655.1728    | 34.227      | 0.287      | 2.237    | 6.077      |
| 9        | 18.520      | 1098.3316   | 40.831      | 0.387      | 3.749    | 7.249      |
| 10       | 19.507      | 1531.9080   | 57.470      | 0.320      | 5.230    | 10.203     |
| 11       | 21.120      | 1984.5500   | 58.380      | 0.680      | 6.775    | 10.365     |
| 12       | 21.593      | 1317.5156   | 47.590      | 0.480      | 4.498    | 8.449      |
| 13       | 22.593      | 1564.6360   | 22.671      | 1.260      | 5.341    | 4.025      |
| 14       | 26.027      | 1451.1175   | 17.059      | 1.113      | 4.954    | 3.029      |
| 15       | 26.960      | 1323.0817   | 16.398      | 1.653      | 4.517    | 2.911      |
| 16       | 30.613      | 14383.5893  | 170.569     | 0.880      | 49.102   | 30.282     |
| 17       | 32.607      | 2316.0542   | 18.949      | 2.427      | 7.906    | 3.364      |
| 18       | 36.847      | 126.2726    | 2.516       | 0.680      | 0.432    | 0.446      |
| -        | Total       | 29293.1870  | 563.268     |            |          |            |

Figure S3.9.

Sample ID : 21mer1-0602224  
 Raw Data : 21mer124  
 Primary : 21mer124  
 Project : zhou  
 Calibration Standard

Analyst : zhou  
 From : Wed, 8th Mar, 2006 21:08:21  
 Calibration : (none)  
 Style : report

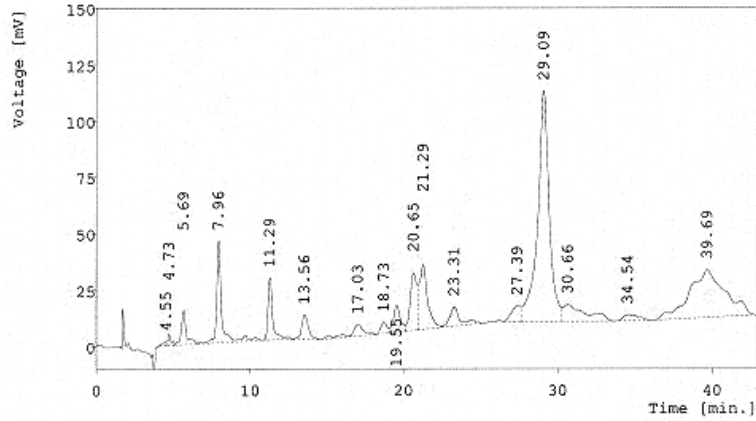

Result Table - Calculation Method Uncal

| Peak No. | Reten. time | Area [mV.s] | Height [mV] | W05 [min.] | Area [%] | Height [%] |
|----------|-------------|-------------|-------------|------------|----------|------------|
| 1        | 4.553       | 36.2000     | 2.046       | 0.293      | 0.236    | 0.618      |
| 2        | 4.733       | 70.0691     | 5.185       | 0.147      | 0.456    | 1.567      |
| 3        | 5.693       | 342.9990    | 15.288      | 0.287      | 2.233    | 4.620      |
| 4        | 7.960       | 1042.2392   | 45.151      | 0.253      | 6.785    | 13.644     |
| 5        | 11.287      | 585.0635    | 27.517      | 0.273      | 3.809    | 8.315      |
| 6        | 13.560      | 333.5481    | 10.864      | 0.447      | 2.171    | 3.283      |
| 7        | 17.033      | 285.5210    | 5.160       | 0.573      | 1.859    | 1.559      |
| 8        | 18.733      | 135.9159    | 4.997       | 0.467      | 0.885    | 1.510      |
| 9        | 19.553      | 370.2703    | 12.049      | 0.433      | 2.410    | 3.641      |
| 10       | 20.653      | 743.6990    | 25.222      | 0.507      | 4.841    | 7.622      |
| 11       | 21.287      | 1082.0897   | 28.510      | 0.607      | 7.044    | 8.615      |
| 12       | 23.313      | 395.9112    | 8.477       | 0.540      | 2.577    | 2.562      |
| 13       | 27.393      | 276.6690    | 6.951       | 0.673      | 1.801    | 2.100      |
| 14       | 29.093      | 5356.8608   | 102.476     | 0.673      | 34.871   | 30.967     |
| 15       | 30.660      | 763.0301    | 7.442       | 1.407      | 4.967    | 2.249      |
| 16       | 34.540      | 177.3239    | 2.628       | 1.233      | 1.154    | 0.794      |
| 17       | 39.693      | 3364.6302   | 20.959      | 2.593      | 21.901   | 6.334      |
| -        | Total       | 15362.0398  | 330.923     |            |          |            |

Figure S3.10.



Sample ID : 21mer2-060224  
 Raw Data : 21mer2-1  
 Primary : 21mer2-1  
 Project : zhou  
 Calibration Standard

Analyst : zhou  
 From : Mon, 27th Feb, 2006 11:47:07  
 Calibration : (none)  
 Style : report

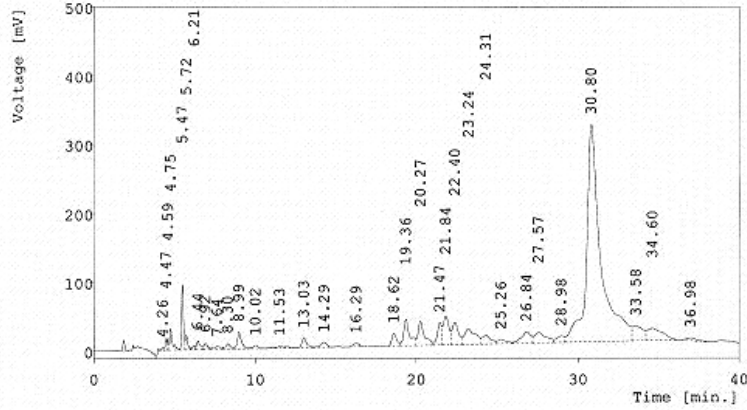

Result Table - Calculation Method Uncal

| Peak No. | Reten. time | Area [mV.s] | Height [mV] | W05 [min.] | Area [%] | Height [%] |
|----------|-------------|-------------|-------------|------------|----------|------------|
| 1        | 4.260       | 32.0300     | 3.849       | 0.100      | 0.095    | 0.416      |
| 2        | 4.473       | 119.0869    | 16.892      | 0.113      | 0.354    | 1.827      |
| 3        | 4.593       | 107.1956    | 17.492      | 0.127      | 0.318    | 1.892      |
| 4        | 4.747       | 350.2760    | 31.421      | 0.133      | 1.041    | 3.399      |
| 5        | 5.473       | 733.6216    | 95.193      | 0.120      | 2.179    | 10.297     |
| 6        | 5.720       | 218.2045    | 21.477      | 0.173      | 0.648    | 2.323      |
| 7        | 6.207       | 86.8179     | 6.407       | 0.213      | 0.258    | 0.693      |
| 8        | 6.440       | 202.9084    | 12.693      | 0.207      | 0.603    | 1.373      |
| 9        | 6.920       | 146.4063    | 9.267       | 0.267      | 0.435    | 1.002      |
| 10       | 7.640       | 126.1506    | 3.960       | 0.593      | 0.375    | 0.428      |
| 11       | 8.300       | 166.3989    | 7.762       | 0.293      | 0.494    | 0.840      |
| 12       | 8.993       | 457.7123    | 24.393      | 0.240      | 1.360    | 2.639      |
| 13       | 10.020      | 93.6310     | 4.542       | 0.300      | 0.278    | 0.491      |
| 14       | 11.533      | 145.1511    | 3.388       | 0.340      | 0.431    | 0.366      |
| 15       | 13.027      | 296.6766    | 14.215      | 0.287      | 0.881    | 1.538      |
| 16       | 14.287      | 178.3365    | 7.082       | 0.367      | 0.530    | 0.766      |
| 17       | 16.287      | 123.8551    | 4.875       | 0.420      | 0.368    | 0.527      |
| 18       | 18.620      | 392.6208    | 18.792      | 0.313      | 1.166    | 2.033      |
| 19       | 19.360      | 994.8430    | 38.816      | 0.307      | 2.955    | 4.199      |
| 20       | 20.267      | 972.7175    | 35.101      | 0.347      | 2.889    | 3.797      |
| 21       | 21.473      | 609.1061    | 32.690      | 0.307      | 1.809    | 3.536      |
| 22       | 21.840      | 1018.0824   | 41.659      | 0.487      | 3.024    | 4.506      |
| 23       | 22.400      | 895.8309    | 32.294      | 0.500      | 2.661    | 3.493      |
| 24       | 23.240      | 1074.4374   | 22.574      | 0.940      | 3.192    | 2.442      |
| 25       | 24.313      | 480.8974    | 12.412      | 0.640      | 1.429    | 1.343      |
| 26       | 25.260      | 227.3574    | 6.408       | 0.660      | 0.675    | 0.693      |
| 27       | 26.840      | 668.5073    | 16.664      | 0.687      | 1.986    | 1.803      |
| 28       | 27.567      | 767.8368    | 15.372      | 0.920      | 2.281    | 1.663      |
| 29       | 28.980      | 301.6653    | 9.205       | 0.593      | 0.896    | 0.996      |
| 30       | 30.800      | 19336.3928  | 314.897     | 0.680      | 57.439   | 34.063     |
| 31       | 33.580      | 963.5682    | 20.825      | 0.867      | 2.862    | 2.253      |

(1-1)

Figure S3.11.

Sample ID : 21mer2-0602224  
 Raw Data : 21mer2-3  
 Primary : 21mer2-3  
 Project : zhou  
 Calibration Standard

Analyst : zhou  
 From : Fri, 10th Mar, 2006 14:03:51  
 Calibration : (none)  
 Style : report

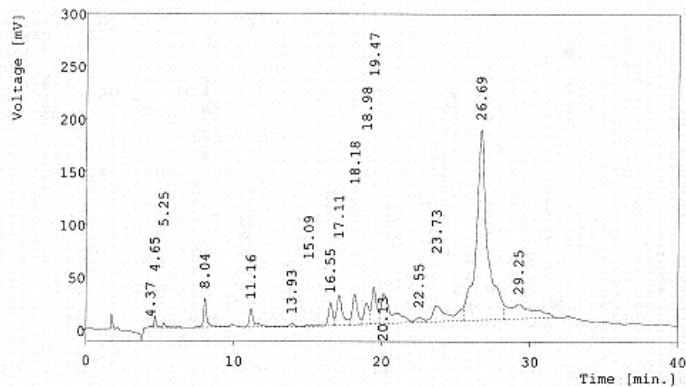

Result Table - Calculation Method Uncai

| Peak No. | Reten. time | Area [mV.s] | Height [mV] | W05 [min.] | Area [%] | Height [%] |
|----------|-------------|-------------|-------------|------------|----------|------------|
| 1        | 4.373       | 5.8963      | 0.631       | 0.160      | 0.032    | 0.143      |
| 2        | 4.653       | 102.4957    | 11.021      | 0.133      | 0.553    | 2.492      |
| 3        | 5.253       | 80.8893     | 4.462       | 0.133      | 0.437    | 1.009      |
| 4        | 8.040       | 440.3505    | 27.498      | 0.200      | 2.378    | 6.217      |
| 5        | 11.160      | 390.7956    | 17.494      | 0.253      | 2.110    | 3.955      |
| 6        | 13.933      | 104.2970    | 3.216       | 0.360      | 0.563    | 0.727      |
| 7        | 15.087      | 75.0544     | 1.859       | 0.453      | 0.405    | 0.420      |
| 8        | 16.547      | 418.0514    | 21.869      | 0.313      | 2.257    | 4.944      |
| 9        | 17.113      | 716.6348    | 28.588      | 0.367      | 4.193    | 6.463      |
| 10       | 18.180      | 689.4104    | 28.793      | 0.360      | 3.723    | 6.510      |
| 11       | 18.980      | 476.5012    | 20.055      | 0.433      | 2.573    | 4.534      |
| 12       | 19.467      | 790.3087    | 34.889      | 0.360      | 4.267    | 7.888      |
| 13       | 20.127      | 1446.1226   | 28.399      | 0.553      | 7.808    | 6.421      |
| 14       | 22.553      | 161.3655    | 4.456       | 0.660      | 0.871    | 1.007      |
| 15       | 23.727      | 1235.1346   | 15.313      | 0.813      | 6.669    | 3.462      |
| 16       | 26.693      | 9648.0064   | 179.905     | 0.587      | 52.095   | 40.675     |
| 17       | 29.253      | 1678.6563   | 13.853      | 2.553      | 9.066    | 3.133      |
| -        | Total       | 18519.9710  | 442.302     |            |          |            |

(2-2)

Figure S3.12

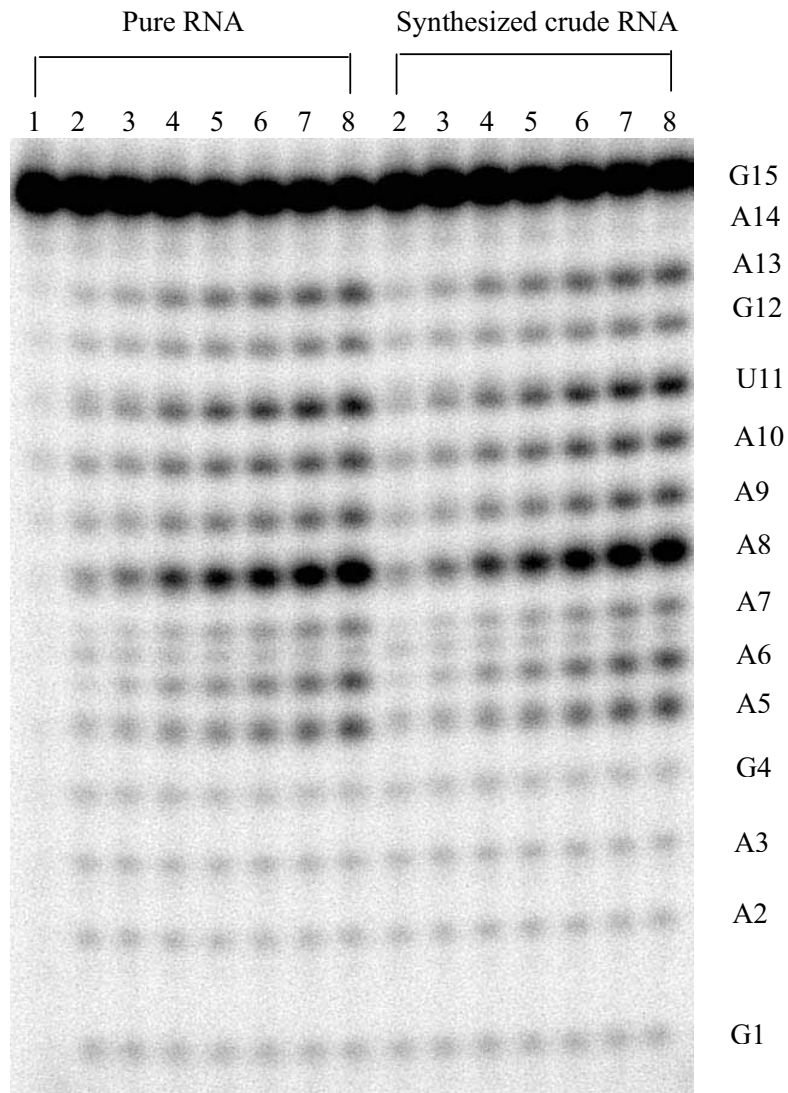

**Figure S4.** RNase H digestion of 15 mer DNA/RNA duplex. Lanes 1 – 8 represent digestion of RNA after 0, 2, 5, 10, 15, 25, 40, 60 min of incubation with enzyme. Conditions of cleavage reactions: pure RNA ( $0.1 \mu\text{M}$ ) or crude RNA ( $0.1 \mu\text{M}$ ) and complementary DNA ( $1 \mu\text{M}$ ) in buffer containing 20 mM Tris-HCl (pH 8.0), 20 mM KCl, 10 mM  $\text{MgCl}_2$  and 0.1 mM DTT at  $21 \text{ }^\circ\text{C}$ ; 0.06 U of RNase H in a total reaction volume of  $30 \mu\text{L}$ .

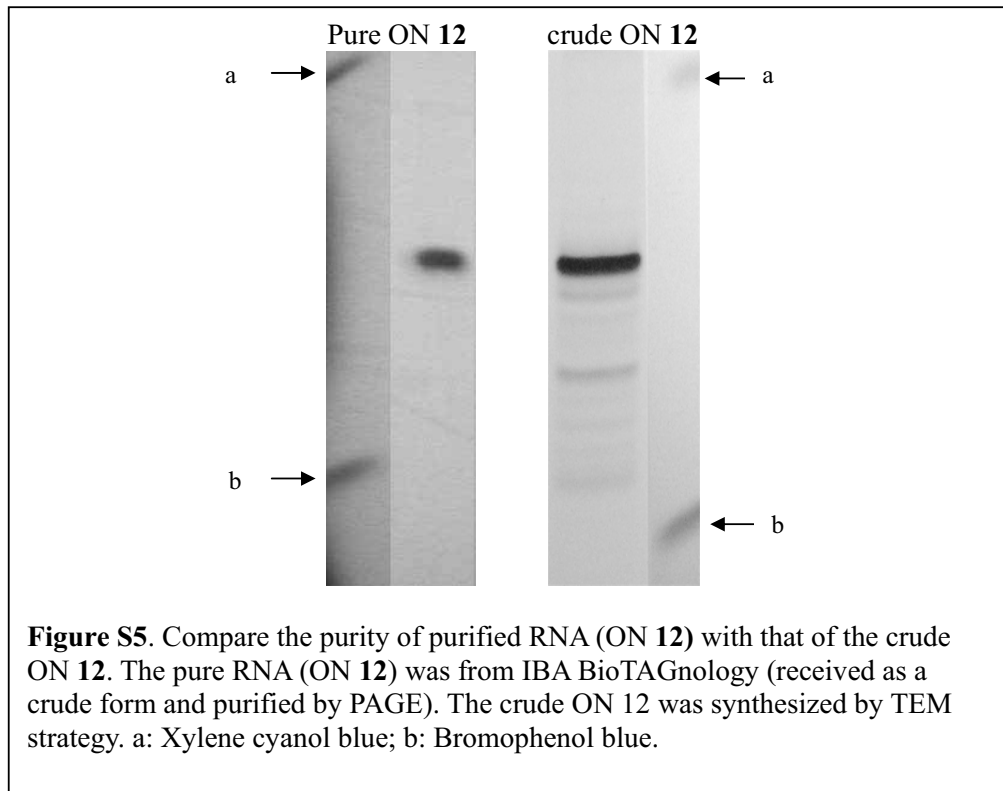

Supplement: b614210a.pdf [file b614210a.pdf]
